# Supplementary material for: Integration of Posttranscriptional Gene Networks into Metabolic Adaptation and Biofilm Maturation in Candida albicans
Source: PLoS Genet. 2015 Oct 16;11(10):e1005590. doi: 10.1371/journal.pgen.1005590 (PMC4608769; doi:10.1371/journal.pgen.1005590)
Supplement: S3 Dataset — (XLSX) [file pgen.1005590.s013.xlsx]

## Sheet: Sheet1
The 3’UTRs from genes conserved between C. albicans and S. cerevisiae were binned into the indicated length windows to search for enriched functional categories. For the C. albicans genes, the gene names were input into the GO: term finder in the Candida Genome Database (CGD). For S. cerevisiae the gene names for each size window were input into the analogous GO: term finder in the Saccharomyces …
	C. albicans GO Terms: Function (3' UTR of less than 50 bases)
		GOID	GO_term	Cluster frequency	Background frequency	Corrected P-value	False discovery rate	Gene(s) annotated to the term	Directly Annotated GOID List
		16740	transferase activity	120 out of 672 genes, 17.9%	770 out of 6473 background genes, 11.9%	0.00048	0	LEU4:C1_00330C_A:C1_00510W_A:C1_01360C_A:TRM2:ABP140:C1_02200C_A:SPP1:C1_05370C_A:C1_06090C_A:VPS34:YPD1:C1_07490C_A:TERT:C1_09040C_A:C1_10950C_A:C1_11790W_A:AKR1:DIM1:C1_14160W_A:RPC10:C1_14500C_A:SAS2:RAD7:C2_02360C_A:SMP3:ADE8:RAD32:STE11:CRK1:CKA2:PEX2:C2_05520W_A:C2_06040C_A:SER1:C2_06780C_A:EAF3:CMK2:KIN3:C2_10790C_A:C3_00310C_A:C3_00380C_A:C3_00790W_A:C3_02210C_A:PNP1:C3_03310C_A:RAD53:URK…	4059:4712:4379:70577:17176:16491:4683:3896:46899:4316:47724:34450:4674:42281:32947:8478:19171:4731:43495:9041:71618:287:52723:4017:18064:10485:4401:3682:4314:4871:3848:5524:52724:3688:1990189:52735:8176:3870:16407:4026:43424:4579:4402:3684:43047:30554:8408:3887:52858:3697:4849:8094:35064:32931:4313:829:14:3677:42162:16887:50265:51880:8144:4319:16773:9383:4514:4516:16763:47536:8080:830:3721:42124:…
		5488	binding	304 out of 672 genes, 45.2%	2423 out of 6473 background genes, 37.4%	0.00325	0	C1_00210C_A:HBR1:ENA2:C1_00430W_A:C1_00660C_A:C1_01000C_A:VPS17:ISN1:C1_02030C_A:GAL10:ABP140:C1_02510W_A:MGM101:SPP1:C1_03450C_A:MED17:COQ6:HMG1:C1_03830C_A:C1_03990W_A:ACS2:APE2:VPS16:RRP6:C1_05370C_A:C1_05380C_A:C1_05420W_A:KOG1:C1_06090C_A:MSI3:C1_06760C_A:C1_07090C_A:ZCF23:YPD1:C1_07490C_A:TERT:TEF2:UPC2:C1_08490W_A:SWI6:C1_08860C_A:C1_09840C_A:ECM21:C1_10280C_A:C1_10330C_A:C1_10420C_A:C1_10…	1169:4712:5543:4379:70577:15086:4683:46899:8554:8233:32947:33919:43495:43014:175:36435:19843:8409:31072:978:4017:2161:4821:19209:5198:32450:8312:5524:3688:52735:340:19887:42626:4003:982:43424:3684:35091:5484:43047:30246:8408:31490:50661:52858:3887:4849:3697:3725:3756:30276:14:3952:1152:49:3824:104:993:16773:30429:1671:3721:16409:4749:5053:5085:1003:19789:1054:4190:4349:97020:5078:43022:3735:5048:…
		16787	hydrolase activity	128 out of 672 genes, 19.0%	865 out of 6473 background genes, 13.4%	0.00335	0	C1_00320W_A:HBR1:ENA2:C1_00520W_A:NMA111:TRM2:ISN1:EHD3:ENG1:SEN15:APE2:RRP6:C1_05420W_A:C1_05670W_A:MSI3:C1_06800W_A:C1_07090C_A:TEF2:C1_08490W_A:C1_08860C_A:PLD1:RAD54:OCA6:C1_14240W_A:C1_14310W_A:DDI1:C1_14460W_A:C2_00360C_A:C2_00740C_A:UBP13:C2_01240C_A:C2_01530C_A:SMP2:RAD7:C2_02290C_A:C2_02490C_A:SER2:HSP78:C2_03910C_A:C2_05980C_A:C2_06230W_A:SPF1:PRE2:C2_07440C_A:SWR1:RAD57:MSU1:RDH54:BMS1…	4338:15086:8554:8233:32947:33919:175:8138:8409:31072:52723:4017:2161:5198:32450:5524:3688:4722:52862:340:42626:61133:4003:35091:3684:43047:30246:8408:3887:3697:14:3952:49:30429:830:1003:19789:4190:43022:831:15616:1008:70635:4438:4620:70140:16888:10521:5525:8821:774:32137:1002:47429:4181:46403:4806:4842:4407:42277:3729:46961:31593:32138:8143:3676:42973:51908:8301:34511:3860:34459:4359:213:16929:47…
		1002	RNA polymerase III type 1 promoter sequence-specific DNA binding	5 out of 672 genes, 0.7%	6 out of 6473 background genes, 0.1%	0.02884	0	C1_10920W_A:PZF1:TFC4:C4_04510W_A:C7_01650W_A	1152:1003:43035:1008:1002:8301:71443:3700:8270:995:16791:1005
		1007	transcription factor activity, RNA polymerase III transcription factor binding	5 out of 672 genes, 0.7%	6 out of 6473 background genes, 0.1%	0.02884	0	C1_10920W_A:PZF1:TFC4:C4_04510W_A:C7_01650W_A	1152:1003:43035:1008:1002:8301:71443:3700:8270:995:16791:1005
		1030	RNA polymerase III type 1 promoter DNA binding	5 out of 672 genes, 0.7%	6 out of 6473 background genes, 0.1%	0.02884	0	C1_10920W_A:PZF1:TFC4:C4_04510W_A:C7_01650W_A	1152:1003:43035:1008:1002:8301:71443:3700:8270:995:16791:1005
		1153	transcription factor activity, RNA polymerase III transcription factor recruiting	5 out of 672 genes, 0.7%	6 out of 6473 background genes, 0.1%	0.02884	0	C1_10920W_A:PZF1:TFC4:C4_04510W_A:C7_01650W_A	1152:1003:43035:1008:1002:8301:71443:3700:8270:995:16791:1005
		80084	5S rDNA binding	5 out of 672 genes, 0.7%	6 out of 6473 background genes, 0.1%	0.02884	0	C1_10920W_A:PZF1:TFC4:C4_04510W_A:C7_01650W_A	1152:1003:43035:1008:1002:8301:71443:3700:8270:995:16791:1005
		992	polymerase III regulatory region sequence-specific DNA binding	5 out of 672 genes, 0.7%	6 out of 6473 background genes, 0.1%	0.02884	0	C1_10920W_A:PZF1:TFC4:C4_04510W_A:C7_01650W_A	1152:1003:43035:1008:1002:8301:71443:3700:8270:995:16791:1005
		5515	protein binding	83 out of 672 genes, 12.4%	548 out of 6473 background genes, 8.5%	0.07768	0.002	C1_00210C_A:C1_00430W_A:C1_00660C_A:ABP140:C1_02510W_A:SPP1:MED17:C1_03990W_A:KOG1:MSI3:YPD1:C1_09840C_A:ECM21:C1_10330C_A:C1_10420C_A:C1_11250W_A:C1_11600W_A:C1_12830C_A:C1_12920C_A:DDI1:RRN3:C2_00320W_A:HIR1:C2_00420W_A:LHS1:SGT2:PAN1:HSP78:STE11:RPN10:C2_07860W_A:RAD57:VPS28:C2_09620W_A:C2_10790C_A:TIM44:STE50:GPA2:ECM29:C3_07350W_A:PEX5:C4_01130C_A:C4_02780W_A:C4_03090W_A:SEC15:SSZ1:C4_06160W…	1169:70577:8233:32947:43495:43014:36435:31072:4017:19209:5198:5524:52735:19887:43424:35091:5484:43047:8408:3756:30276:49:993:1671:5053:4190:97020:5078:8599:4709:1138:42800:31625:1139:10484:8157:5525:17025:774:51015:5200:4842:1097:42277:33613:42803:31593:16772:42393:5052:19901:19905:1129:3712:3779:3690:19153:3743:1181:3682:4871:80025:51010:31683:35064:1664:3677:1179:16887:51880:1082:1104:51082:554…
		182	rDNA binding	6 out of 672 genes, 0.9%	10 out of 6473 background genes, 0.2%	0.07878	0.0018	C1_10920W_A:PZF1:TFC4:C4_04510W_A:POL5:C7_01650W_A	3887:1152:1003:43035:1008:1002:8301:71443:3700:8270:182:995:16791:1005
		30515	snoRNA binding	9 out of 672 genes, 1.3%	22 out of 6473 background genes, 0.3%	0.08395	0.0017	C1_14080W_A:UTP8:BUD21:BMS1:UTP9:NAN1:RRP9:CR_04110W_A:CR_06840W_A	19843:5524:49:5525:3729:34511:30515:3924:3723
		1016	RNA polymerase III regulatory region DNA binding	5 out of 672 genes, 0.7%	7 out of 6473 background genes, 0.1%	0.0923	0.0031	C1_10920W_A:PZF1:TFC4:C4_04510W_A:C7_01650W_A	1152:1003:43035:1008:1002:8301:71443:3700:8270:995:16791:1005
	C. albicans GO Terms: Function (3' UTR of between 50-99 bases)
		GOID	GO_term	Cluster frequency	Background frequency	Corrected P-value	False discovery rate	Gene(s) annotated to the term	Directly Annotated GOID List
		5488	binding	661 out of 1369 genes, 48.3%	2423 out of 6473 background genes, 37.4%	1.01e-17	0	TUP1:MVD:RCA1:CCT8:C1_00160C_A:GLO1:TUF1:VPS27:C1_00810W_A:RPB11:ZPR1:C1_01160C_A:STB5:CRL1:RPS21:C1_01530C_A:RPB7:C1_01820C_A:C1_01850C_A:C1_01920W_A:C1_01940C_A:SHA3:GAL7:C1_02290C_A:C1_02300W_A:C1_02310C_A:C1_02430C_A:HOM6:FRS2:RAD16:MIA40:MST1:ORC1:GGA2:BMH1:MAS1:C1_03400W_A:HFL1:MNS1:STR2:SKO1:C1_03790C_A:RPP1:C1_03870C_A:C1_03920C_A:C1_04030W_A:C1_04040C_A:C1_04120C_A:C1_04230W_A:HHF1:SSA2:…	16423:8483:4712:5543:4449:70577:4409:4316:8233:70273:16747:33328:30955:8379:32947:4618:43495:994:16597:175:1786:988:4809:17024:4788:19843:1882:31072:8409:978:8022:4813:2161:4017:4629:3960:8569:5198:8108:3984:8312:4638:19912:5524:3688:5527:45145:8793:4003:50815:42626:15266:51903:4733:1948:982:3906:4814:5047:3844:1190:51019:35091:825:5484:4402:3684:4012:34042:4810:43047:30246:16616:31490:4559:50661…
		43168	anion binding	234 out of 1369 genes, 17.1%	685 out of 6473 background genes, 10.6%	2.56e-14	0	TUP1:MVD:CCT8:TUF1:VPS27:CRL1:C1_01530C_A:C1_01920W_A:SHA3:FRS2:RAD16:MST1:ORC1:GGA2:BMH1:STR2:C1_04030W_A:SSA2:URA6:TUS1:PHO85:YBN5:SDH1:YPT53:C1_05650W_A:C1_06710W_A:NPR1:MEF2:C1_07050C_A:C1_07340W_A:C1_07470C_A:C1_07510W_A:MTO1:UBA2:FUN12:GCV2:CAF16:CDC42:C1_08540C_A:TCP1:PFK26:HST1:ERG12:GUA1:ADE12:C1_09810W_A:DBP3:ADA2:ARL3:C1_12240C_A:WRS1:CDC54:CHR1:MSH6:SEC18:MODF:C1_14050C_A:YPT52:ARO8:C…	8483:4712:5543:8233:70273:32947:16597:1786:988:4788:4813:2161:4017:8569:5198:3984:4638:19912:5524:3688:8793:4003:50815:42626:4733:4814:5047:35091:4402:3684:4012:43047:17049:3697:3713:4849:4765:30276:3680:49:285:1990269:16301:3824:50177:4496:16773:30976:31078:8289:31071:8117:4458:5089:10181:4826:4375:70095:5078:19001:43022:3962:43531:9378:4664:4709:19948:8762:3872:4823:3855:5487:43141:4864:5515:37…
		166	nucleotide binding	230 out of 1369 genes, 16.8%	680 out of 6473 background genes, 10.5%	1.92e-13	0	MVD:CCT8:C1_00160C_A:TUF1:CRL1:C1_01530C_A:C1_01850C_A:C1_01920W_A:SHA3:HOM6:FRS2:RAD16:MST1:ORC1:C1_04030W_A:C1_04120C_A:SSA2:URA6:PHO85:C1_04790W_A:YBN5:SDH1:YPT53:C1_05650W_A:C1_05990C_A:C1_06710W_A:NPR1:MEF2:C1_07050C_A:C1_07340W_A:C1_07470C_A:MTO1:UBA2:FUN12:SDS24:CAF16:CDC42:C1_08540C_A:TCP1:PFK26:ZWF1:HST1:ERG12:GUA1:IDH1:ADE12:C1_09810W_A:DBP3:ARL3:C1_11900C_A:C1_12240C_A:WRS1:CDC54:CHR1:…	4712:4449:8233:32947:4788:1882:4813:2161:4017:8569:5198:3984:4638:19912:5524:3688:4003:42626:4733:4814:5047:3684:4012:43047:16616:50661:3887:4849:3697:4765:3680:49:285:16301:4496:16773:30976:31078:4458:10181:4826:70095:5078:19001:3735:43022:43531:9378:4709:19948:8762:3872:4823:3855:1056:43141:5515:3774:4830:8677:5525:17025:774:405:32137:4824:5200:4842:70336:43565:3724:3959:4407:42277:3729:51539:1…
		1901265	nucleoside phosphate binding	230 out of 1369 genes, 16.8%	680 out of 6473 background genes, 10.5%	1.92e-13	0	MVD:CCT8:C1_00160C_A:TUF1:CRL1:C1_01530C_A:C1_01850C_A:C1_01920W_A:SHA3:HOM6:FRS2:RAD16:MST1:ORC1:C1_04030W_A:C1_04120C_A:SSA2:URA6:PHO85:C1_04790W_A:YBN5:SDH1:YPT53:C1_05650W_A:C1_05990C_A:C1_06710W_A:NPR1:MEF2:C1_07050C_A:C1_07340W_A:C1_07470C_A:MTO1:UBA2:FUN12:SDS24:CAF16:CDC42:C1_08540C_A:TCP1:PFK26:ZWF1:HST1:ERG12:GUA1:IDH1:ADE12:C1_09810W_A:DBP3:ARL3:C1_11900C_A:C1_12240C_A:WRS1:CDC54:CHR1:…	4712:4449:8233:32947:4788:1882:4813:2161:4017:8569:5198:3984:4638:19912:5524:3688:4003:42626:4733:4814:5047:3684:4012:43047:16616:50661:3887:4849:3697:4765:3680:49:285:16301:4496:16773:30976:31078:4458:10181:4826:70095:5078:19001:3735:43022:43531:9378:4709:19948:8762:3872:4823:3855:1056:43141:5515:3774:4830:8677:5525:17025:774:405:32137:4824:5200:4842:70336:43565:3724:3959:4407:42277:3729:51539:1…
		1882	nucleoside binding	178 out of 1369 genes, 13.0%	487 out of 6473 background genes, 7.5%	1.93e-13	0	MVD:CCT8:TUF1:CRL1:C1_01530C_A:C1_01920W_A:SHA3:FRS2:RAD16:MST1:ORC1:C1_04030W_A:SSA2:URA6:PHO85:YBN5:YPT53:C1_05650W_A:C1_06710W_A:NPR1:MEF2:C1_07050C_A:C1_07340W_A:C1_07470C_A:UBA2:FUN12:CAF16:CDC42:C1_08540C_A:TCP1:PFK26:ERG12:GUA1:ADE12:C1_09810W_A:DBP3:ARL3:C1_12240C_A:WRS1:CDC54:CHR1:MSH6:SEC18:MODF:C1_14050C_A:YPT52:C2_00350W_A:C2_00700W_A:FAB1:PR26:EFT2:C2_03760C_A:SSN3:SUV3:C2_04360W_A:C…	4712:8233:4788:1882:4813:2161:4017:8569:5198:4638:19912:5524:3688:4003:42626:4814:5047:3684:4012:43047:3887:3697:4849:4765:3680:49:285:16301:4496:16773:4826:1054:70095:5078:19001:43022:43531:9378:4709:19948:3872:4823:3855:1056:43141:5515:3774:4830:5525:17025:405:32137:4824:5200:4842:70336:43565:3724:3729:42277:46961:8353:32138:217:30983:4815:3676:42393:30332:4140:4827:4818:4163:8017:3779:46933:37…
		30554	adenyl nucleotide binding	157 out of 1369 genes, 11.5%	413 out of 6473 background genes, 6.4%	2.44e-13	0	MVD:CCT8:C1_01530C_A:C1_01920W_A:SHA3:FRS2:RAD16:MST1:ORC1:C1_04030W_A:SSA2:URA6:PHO85:C1_05650W_A:C1_06710W_A:NPR1:C1_07050C_A:C1_07340W_A:C1_07470C_A:UBA2:SDS24:CAF16:C1_08540C_A:TCP1:PFK26:ERG12:GUA1:DBP3:C1_12240C_A:WRS1:CDC54:CHR1:MSH6:SEC18:MODF:C1_14050C_A:C2_00350W_A:C2_00700W_A:FAB1:PR26:C2_03760C_A:SSN3:SUV3:C2_04360W_A:C2_04380C_A:C2_04500W_A:KIC1:CDC15:CDC7:PEX6:MKK2:RFC1:IMH3:DBF2:RC…	4712:8233:4788:4813:2161:4017:8569:4638:19912:5524:3688:4003:42626:4814:3684:4012:43047:3697:4849:4765:3680:49:285:16301:4496:16773:4826:70095:5078:43531:9378:4709:19948:3872:4823:3855:43141:3774:4830:17025:774:405:32137:4824:4842:70336:43565:3724:3729:42277:46961:8353:32138:217:30983:4815:3676:42393:30332:4140:4827:4818:4163:8017:3779:46933:4839:386:4828:3866:8320:42624:400:4674:3690:4831:72371:…
		36094	small molecule binding	238 out of 1369 genes, 17.4%	712 out of 6473 background genes, 11.0%	2.56e-13	0	MVD:CCT8:C1_00160C_A:TUF1:CRL1:C1_01530C_A:C1_01850C_A:C1_01920W_A:SHA3:HOM6:FRS2:RAD16:MST1:ORC1:BMH1:C1_04030W_A:C1_04120C_A:SSA2:URA6:PHO85:C1_04790W_A:YBN5:SDH1:YPT53:C1_05650W_A:C1_05990C_A:C1_06710W_A:NPR1:MEF2:C1_07050C_A:C1_07340W_A:C1_07470C_A:MTO1:UBA2:FUN12:SDS24:CAF16:CDC42:C1_08540C_A:TCP1:PFK26:ZWF1:HST1:ERG12:GUA1:IDH1:ADE12:C1_09810W_A:DBP3:ADA2:ARL3:C1_11900C_A:C1_12240C_A:WRS1:C…	4712:4449:8233:32947:16597:1786:988:4788:1882:4813:2161:4017:8569:5198:3984:4638:19912:5524:3688:4003:50815:42626:4733:4814:5047:4402:3684:4012:43047:16616:50661:3887:3713:4849:3697:4765:3680:49:285:1990269:16301:50177:4496:16773:30976:31078:4458:10181:4826:1054:70095:5078:19001:3735:43022:43531:9378:4664:4709:19948:8762:3872:4823:3855:1056:43141:4864:5515:3774:4830:8677:5525:17025:774:405:32137:…
		32549	ribonucleoside binding	177 out of 1369 genes, 12.9%	486 out of 6473 background genes, 7.5%	3.57e-13	0	MVD:CCT8:TUF1:CRL1:C1_01530C_A:C1_01920W_A:SHA3:FRS2:RAD16:MST1:ORC1:C1_04030W_A:SSA2:URA6:PHO85:YBN5:YPT53:C1_05650W_A:C1_06710W_A:NPR1:MEF2:C1_07050C_A:C1_07340W_A:C1_07470C_A:UBA2:FUN12:CAF16:CDC42:C1_08540C_A:TCP1:PFK26:ERG12:GUA1:ADE12:C1_09810W_A:DBP3:ARL3:C1_12240C_A:WRS1:CDC54:CHR1:MSH6:SEC18:MODF:C1_14050C_A:YPT52:C2_00350W_A:C2_00700W_A:FAB1:PR26:EFT2:C2_03760C_A:SSN3:SUV3:C2_04360W_A:C…	4712:8233:4788:4813:2161:4017:8569:5198:4638:19912:5524:3688:4003:42626:4814:5047:3684:4012:43047:3697:4849:4765:3680:49:285:16301:4496:16773:4826:1054:70095:5078:19001:43022:43531:9378:4709:19948:3872:4823:3855:1056:43141:5515:3774:4830:5525:17025:405:32137:4824:5200:4842:70336:43565:3724:3729:42277:46961:8353:32138:217:30983:4815:3676:42393:30332:4140:4827:4818:4163:8017:3779:46933:3747:4839:38…
		17076	purine nucleotide binding	179 out of 1369 genes, 13.1%	494 out of 6473 background genes, 7.6%	4.24e-13	0	MVD:CCT8:TUF1:CRL1:C1_01530C_A:C1_01920W_A:SHA3:FRS2:RAD16:MST1:ORC1:C1_04030W_A:SSA2:URA6:PHO85:YBN5:YPT53:C1_05650W_A:C1_06710W_A:NPR1:MEF2:C1_07050C_A:C1_07340W_A:C1_07470C_A:UBA2:FUN12:SDS24:CAF16:CDC42:C1_08540C_A:TCP1:PFK26:ERG12:GUA1:ADE12:C1_09810W_A:DBP3:ARL3:C1_12240C_A:WRS1:CDC54:CHR1:MSH6:SEC18:MODF:C1_14050C_A:YPT52:C2_00350W_A:C2_00700W_A:FAB1:PR26:EFT2:C2_03760C_A:SSN3:SUV3:C2_0436…	4712:8233:4788:4813:2161:4017:8569:5198:4638:19912:5524:3688:4003:42626:4814:5047:3684:4012:43047:3697:4849:4765:3680:49:285:16301:4496:16773:4826:70095:5078:19001:43022:43531:9378:4709:19948:3872:4823:3855:43141:5515:3774:4830:5525:17025:774:405:32137:4824:5200:4842:70336:43565:3724:3729:42277:46961:8353:32138:217:30983:4815:3676:42393:30332:4140:4827:4818:4163:8017:3779:46933:3747:4839:386:4828…
		32559	adenyl ribonucleotide binding	153 out of 1369 genes, 11.2%	402 out of 6473 background genes, 6.2%	5.4e-13	0	MVD:CCT8:C1_01530C_A:C1_01920W_A:SHA3:FRS2:RAD16:MST1:ORC1:C1_04030W_A:SSA2:URA6:PHO85:C1_05650W_A:C1_06710W_A:NPR1:C1_07050C_A:C1_07340W_A:C1_07470C_A:UBA2:CAF16:C1_08540C_A:TCP1:PFK26:ERG12:GUA1:DBP3:C1_12240C_A:WRS1:CDC54:CHR1:MSH6:SEC18:MODF:C1_14050C_A:C2_00350W_A:C2_00700W_A:FAB1:PR26:C2_03760C_A:SSN3:SUV3:C2_04360W_A:C2_04380C_A:C2_04500W_A:KIC1:CDC15:CDC7:PEX6:MKK2:RFC1:DBF2:RCK2:CCT5:MCM…	4712:8233:4788:4813:2161:4017:8569:4638:19912:5524:3688:4003:42626:4814:3684:4012:43047:3697:4849:4765:3680:49:285:16301:4496:16773:4826:70095:5078:43531:9378:4709:19948:3872:4823:3855:43141:3774:4830:17025:405:32137:4824:4842:70336:43565:3724:3729:42277:46961:8353:32138:217:30983:4815:3676:42393:30332:4140:4827:4818:4163:8017:3779:46933:4839:386:4828:3866:8320:42624:400:4674:3690:4831:72371:9041…
		5524	ATP binding	152 out of 1369 genes, 11.1%	399 out of 6473 background genes, 6.2%	6.18e-13	0	MVD:CCT8:C1_01530C_A:C1_01920W_A:SHA3:FRS2:RAD16:MST1:ORC1:C1_04030W_A:SSA2:URA6:PHO85:C1_05650W_A:C1_06710W_A:NPR1:C1_07050C_A:C1_07340W_A:C1_07470C_A:UBA2:CAF16:C1_08540C_A:TCP1:PFK26:ERG12:GUA1:DBP3:C1_12240C_A:WRS1:CDC54:CHR1:MSH6:SEC18:MODF:C1_14050C_A:C2_00350W_A:C2_00700W_A:FAB1:PR26:C2_03760C_A:SSN3:SUV3:C2_04360W_A:C2_04380C_A:C2_04500W_A:KIC1:CDC15:CDC7:PEX6:MKK2:RFC1:DBF2:RCK2:CCT5:MCM…	4712:4788:4813:2161:4017:8569:4638:19912:5524:3688:4003:42626:4814:3684:4012:43047:3697:4849:4765:3680:49:285:16301:4496:16773:4826:70095:5078:43531:9378:4709:19948:3872:4823:3855:43141:3774:4830:17025:405:32137:4824:4842:70336:43565:3724:3729:42277:46961:8353:32138:217:30983:4815:3676:42393:30332:4140:4827:4818:4163:8017:3779:46933:4839:386:4828:3866:8320:42624:400:4674:3690:4831:72371:9041:4222…
		1883	purine nucleoside binding	175 out of 1369 genes, 12.8%	482 out of 6473 background genes, 7.4%	7.58e-13	0	MVD:CCT8:TUF1:CRL1:C1_01530C_A:C1_01920W_A:SHA3:FRS2:RAD16:MST1:ORC1:C1_04030W_A:SSA2:URA6:PHO85:YBN5:YPT53:C1_05650W_A:C1_06710W_A:NPR1:MEF2:C1_07050C_A:C1_07340W_A:C1_07470C_A:UBA2:FUN12:CAF16:CDC42:C1_08540C_A:TCP1:PFK26:ERG12:GUA1:ADE12:C1_09810W_A:DBP3:ARL3:C1_12240C_A:WRS1:CDC54:CHR1:MSH6:SEC18:MODF:C1_14050C_A:YPT52:C2_00350W_A:C2_00700W_A:FAB1:PR26:EFT2:C2_03760C_A:SSN3:SUV3:C2_04360W_A:C…	4712:8233:4788:4813:2161:4017:8569:5198:4638:19912:5524:3688:4003:42626:4814:5047:3684:4012:43047:3697:4849:4765:3680:49:285:16301:4496:16773:4826:70095:5078:19001:43022:43531:9378:4709:19948:3872:4823:3855:43141:5515:3774:4830:5525:17025:405:32137:4824:5200:4842:70336:43565:3724:3729:42277:46961:8353:32138:217:30983:4815:3676:42393:30332:4140:4827:4818:4163:8017:3779:46933:3747:4839:386:4828:190…
		32550	purine ribonucleoside binding	175 out of 1369 genes, 12.8%	482 out of 6473 background genes, 7.4%	7.58e-13	0	MVD:CCT8:TUF1:CRL1:C1_01530C_A:C1_01920W_A:SHA3:FRS2:RAD16:MST1:ORC1:C1_04030W_A:SSA2:URA6:PHO85:YBN5:YPT53:C1_05650W_A:C1_06710W_A:NPR1:MEF2:C1_07050C_A:C1_07340W_A:C1_07470C_A:UBA2:FUN12:CAF16:CDC42:C1_08540C_A:TCP1:PFK26:ERG12:GUA1:ADE12:C1_09810W_A:DBP3:ARL3:C1_12240C_A:WRS1:CDC54:CHR1:MSH6:SEC18:MODF:C1_14050C_A:YPT52:C2_00350W_A:C2_00700W_A:FAB1:PR26:EFT2:C2_03760C_A:SSN3:SUV3:C2_04360W_A:C…	4712:8233:4788:4813:2161:4017:8569:5198:4638:19912:5524:3688:4003:42626:4814:5047:3684:4012:43047:3697:4849:4765:3680:49:285:16301:4496:16773:4826:70095:5078:19001:43022:43531:9378:4709:19948:3872:4823:3855:43141:5515:3774:4830:5525:17025:405:32137:4824:5200:4842:70336:43565:3724:3729:42277:46961:8353:32138:217:30983:4815:3676:42393:30332:4140:4827:4818:4163:8017:3779:46933:3747:4839:386:4828:190…
		32555	purine ribonucleotide binding	175 out of 1369 genes, 12.8%	482 out of 6473 background genes, 7.4%	7.58e-13	0	MVD:CCT8:TUF1:CRL1:C1_01530C_A:C1_01920W_A:SHA3:FRS2:RAD16:MST1:ORC1:C1_04030W_A:SSA2:URA6:PHO85:YBN5:YPT53:C1_05650W_A:C1_06710W_A:NPR1:MEF2:C1_07050C_A:C1_07340W_A:C1_07470C_A:UBA2:FUN12:CAF16:CDC42:C1_08540C_A:TCP1:PFK26:ERG12:GUA1:ADE12:C1_09810W_A:DBP3:ARL3:C1_12240C_A:WRS1:CDC54:CHR1:MSH6:SEC18:MODF:C1_14050C_A:YPT52:C2_00350W_A:C2_00700W_A:FAB1:PR26:EFT2:C2_03760C_A:SSN3:SUV3:C2_04360W_A:C…	4712:8233:4788:4813:2161:4017:8569:5198:4638:19912:5524:3688:4003:42626:4814:5047:3684:4012:43047:3697:4849:4765:3680:49:285:16301:4496:16773:4826:70095:5078:19001:43022:43531:9378:4709:19948:3872:4823:3855:43141:5515:3774:4830:5525:17025:405:32137:4824:5200:4842:70336:43565:3724:3729:42277:46961:8353:32138:217:30983:4815:3676:42393:30332:4140:4827:4818:4163:8017:3779:46933:3747:4839:386:4828:190…
		35639	purine ribonucleoside triphosphate binding	174 out of 1369 genes, 12.7%	479 out of 6473 background genes, 7.4%	8.76e-13	0	MVD:CCT8:TUF1:CRL1:C1_01530C_A:C1_01920W_A:SHA3:FRS2:RAD16:MST1:ORC1:C1_04030W_A:SSA2:URA6:PHO85:YBN5:YPT53:C1_05650W_A:C1_06710W_A:NPR1:MEF2:C1_07050C_A:C1_07340W_A:C1_07470C_A:UBA2:FUN12:CAF16:CDC42:C1_08540C_A:TCP1:PFK26:ERG12:GUA1:ADE12:C1_09810W_A:DBP3:ARL3:C1_12240C_A:WRS1:CDC54:CHR1:MSH6:SEC18:MODF:C1_14050C_A:YPT52:C2_00350W_A:C2_00700W_A:FAB1:PR26:EFT2:C2_03760C_A:SSN3:SUV3:C2_04360W_A:C…	4712:4788:4813:2161:4017:8569:5198:4638:19912:5524:3688:4003:42626:4814:5047:3684:4012:43047:3697:4849:4765:3680:49:285:16301:4496:16773:4826:70095:5078:19001:43022:43531:9378:4709:19948:3872:4823:3855:43141:5515:3774:4830:5525:17025:405:32137:4824:5200:4842:70336:43565:3724:3729:42277:46961:8353:32138:217:30983:4815:3676:42393:30332:4140:4827:4818:4163:8017:3779:46933:3747:4839:386:4828:19003:38…
		97367	carbohydrate derivative binding	184 out of 1369 genes, 13.4%	518 out of 6473 background genes, 8.0%	1.53e-12	0	MVD:CCT8:TUF1:CRL1:C1_01530C_A:C1_01920W_A:SHA3:FRS2:RAD16:MST1:ORC1:C1_04030W_A:SSA2:URA6:PHO85:YBN5:YPT53:C1_05650W_A:C1_06710W_A:NPR1:MEF2:C1_07050C_A:C1_07340W_A:C1_07470C_A:UBA2:FUN12:CAF16:CDC42:C1_08540C_A:TCP1:PFK26:ERG12:GUA1:ADE12:C1_09810W_A:DBP3:ADA2:ARL3:C1_12240C_A:WRS1:CDC54:CHR1:MSH6:SEC18:MODF:C1_14050C_A:YPT52:C2_00350W_A:C2_00700W_A:FAB1:PR26:EFT2:C2_03760C_A:SSN3:SUV3:C2_04360…	4712:8233:1786:988:4788:1882:4813:2161:4017:8569:5198:4638:19912:5524:3688:4003:42626:4733:1948:4814:5047:4402:3684:4012:43047:3887:3697:3713:4849:4765:3680:49:285:16301:4496:16773:10181:4826:1054:70095:5078:19001:43022:43531:9378:4709:19948:3872:4823:3855:1056:43141:5515:3774:4830:5525:17025:405:32137:4824:5200:4842:70336:43565:3724:3959:3729:42277:46961:8353:32138:217:30983:4815:3676:42393:3033…
		43167	ion binding	343 out of 1369 genes, 25.1%	1149 out of 6473 background genes, 17.8%	5.41e-12	0	TUP1:MVD:CCT8:GLO1:TUF1:VPS27:ZPR1:C1_01160C_A:STB5:CRL1:C1_01530C_A:C1_01920W_A:SHA3:GAL7:FRS2:RAD16:MST1:ORC1:GGA2:BMH1:MAS1:MNS1:STR2:C1_03870C_A:C1_03920C_A:C1_04030W_A:SSA2:URA6:TUS1:PHO85:ERG3:YBN5:SDH1:YPT53:C1_05650W_A:C1_05750C_A:C1_06710W_A:NPR1:MEF2:PUT3:C1_07050C_A:C1_07340W_A:C1_07470C_A:C1_07510W_A:MTO1:UBA2:FUN12:GCV2:CAF16:CDC42:ENO1:C1_08540C_A:TCP1:C1_08660C_A:SEC24:PFK26:HST1:A…	8483:4712:5543:4449:4316:8233:70273:16747:30955:32947:994:16597:1786:988:4788:978:8022:4813:2161:4017:4629:3960:8569:5198:8108:3984:4638:19912:5524:3688:8793:4003:50815:42626:51903:4733:1948:4814:5047:3844:35091:4402:3684:4012:43047:30246:4559:3887:17049:3697:3713:4849:4765:30276:249:3680:4177:49:285:1990269:16301:3824:50177:4496:16773:8193:30976:1671:3879:32454:31078:8289:31071:8117:4458:5089:10…
		32553	ribonucleotide binding	179 out of 1369 genes, 13.1%	508 out of 6473 background genes, 7.8%	9.49e-12	0	MVD:CCT8:TUF1:CRL1:C1_01530C_A:C1_01920W_A:SHA3:FRS2:RAD16:MST1:ORC1:C1_04030W_A:SSA2:URA6:PHO85:YBN5:YPT53:C1_05650W_A:C1_06710W_A:NPR1:MEF2:C1_07050C_A:C1_07340W_A:C1_07470C_A:UBA2:FUN12:CAF16:CDC42:C1_08540C_A:TCP1:PFK26:ERG12:GUA1:ADE12:C1_09810W_A:DBP3:ARL3:C1_12240C_A:WRS1:CDC54:CHR1:MSH6:SEC18:MODF:C1_14050C_A:YPT52:C2_00350W_A:C2_00700W_A:FAB1:PR26:EFT2:C2_03760C_A:SSN3:SUV3:C2_04360W_A:C…	4712:8233:4788:4813:2161:4017:8569:5198:4638:19912:5524:3688:4003:42626:4733:4814:5047:3684:4012:43047:3697:4849:4765:3680:49:285:16301:4496:16773:10181:4826:70095:5078:19001:43022:43531:9378:4709:19948:3872:4823:3855:43141:5515:3774:4830:5525:17025:405:32137:4824:5200:4842:70336:43565:3724:3959:3729:42277:46961:8353:32138:217:30983:4815:3676:42393:30332:4140:4827:4818:4163:8017:3779:46933:3747:4…
		16740	transferase activity	246 out of 1369 genes, 18.0%	770 out of 6473 background genes, 11.9%	3.17e-11	0	PHR2:C1_00380C_A:TTR1:CIS2:C1_00810W_A:LRO1:RPB11:C1_01250W_A:RPB7:SHA3:GAL7:RAD16:C1_03180W_A:EHT1:HFL1:STR2:C1_03920C_A:KTR4:C1_04110W_A:URA6:PHO85:C1_04530C_A:C1_04560W_A:HAT1:LYS21:ARG2:GPI7:ARO4:C1_05230W_A:C1_05650W_A:POL32:C1_05980W_A:C1_06710W_A:NPR1:ALG9:SWD2:C1_07830C_A:C1_07840W_A:DPM1:TKL1:SAM4:EAF6:C1_08540C_A:GCD6:PFK26:ERG12:MLS1:C1_09790C_A:ADA2:UBA4:NEP1:MCD4:RBK1:C1_12820C_A:CHS…	16423:8483:4712:8495:17176:61543:8963:8898:70037:4316:16747:30955:16783:4618:4105:16597:1786:31:988:4809:4788:1882:8022:34319:4017:3960:42292:5198:8108:3984:4134:19912:5524:3688:42123:8793:3844:35091:825:4402:3684:4588:4810:43047:30246:3887:8603:3713:4849:3697:3725:16415:4765:49:285:16301:4602:4496:16773:4514:4651:8193:16209:30976:8375:3879:8080:8173:4766:4100:31071:16409:4749:4743:5085:19789:105…
		16787	hydrolase activity	268 out of 1369 genes, 19.6%	865 out of 6473 background genes, 13.4%	1.11e-10	0	PHR2:TUF1:DUT1:CRL1:ESP1:C1_01920W_A:C1_02440C_A:SNO1:EXG2:C1_02750C_A:C1_02780W_A:RAD16:ORC1:MAS1:C1_03310W_A:EHT1:MNS1:RPP1:C1_04190C_A:YBN5:YPT53:C1_05780W_A:RAD10:MEF2:C1_07050C_A:C1_07340W_A:GPI8:C1_07470C_A:FUN12:NTG1:CCR4:LTP1:CAF16:CDC42:KEX2:HST1:C1_09070W_A:DOA1:C1_09790C_A:C1_09980C_A:DBP3:LKH1:NIT3:HNT1:C1_10820C_A:ARL3:DPP2:CAS1:RPN2:C1_12170C_A:C1_12350W_A:CDC54:ATP20:CHR1:RPG1A:MSH…	36222:70577:4338:47389:8486:8233:36217:32947:8242:175:42903:8409:42781:4439:34319:4170:2161:4017:16810:8239:4629:8569:5198:4134:5524:3688:4722:45145:42123:52862:4003:42626:1948:3906:5047:3844:36219:50278:4402:3684:4012:34042:43047:30246:4559:3887:3713:3697:3725:4519:14:3680:49:4177:34431:4651:31078:35870:8422:9982:4540:4190:19001:4534:3735:43022:8796:36218:43531:3937:9378:15616:4438:70573:4620:84…
		16462	pyrophosphatase activity	128 out of 1369 genes, 9.3%	347 out of 6473 background genes, 5.4%	2.17e-09	0	TUF1:DUT1:CRL1:C1_01920W_A:C1_02750C_A:RAD16:ORC1:C1_03310W_A:YBN5:YPT53:C1_05780W_A:MEF2:C1_07050C_A:C1_07340W_A:C1_07470C_A:FUN12:CAF16:CDC42:C1_09790C_A:DBP3:ARL3:CAS1:CDC54:ATP20:CHR1:MSH6:SEC18:MODF:C1_14050C_A:YPT52:C2_00350W_A:C2_00570W_A:C2_00700W_A:NPL6:C2_00830C_A:RFC5:KAR2:PR26:EFT2:SUV3:C2_04500W_A:SNU114:LEM3:PEX6:ATP4:RFC1:C2_06110W_A:RTA2:C2_07110C_A:MCM3:KRE30:TEF1:SMC2:RPT6:IPP1:…	36222:70577:8486:36217:32947:4170:4017:8569:5198:5524:3688:45145:4003:42626:5047:36219:4402:3684:4012:43047:3697:14:49:3680:34431:4651:35870:19001:43022:8796:36218:43531:9378:15616:43141:31493:5515:3774:5525:17025:405:32137:3877:36221:5200:4842:70336:43565:3724:3729:51539:15410:46961:32138:217:3676:42393:1102:34459:19901:8017:16740:3747:46933:45134:386:5506:19003:8320:298:42624:400:3690:3743:4309…
		16818	hydrolase activity, acting on acid anhydrides, in phosphorus-containing anhydrides	128 out of 1369 genes, 9.3%	347 out of 6473 background genes, 5.4%	2.17e-09	0	TUF1:DUT1:CRL1:C1_01920W_A:C1_02750C_A:RAD16:ORC1:C1_03310W_A:YBN5:YPT53:C1_05780W_A:MEF2:C1_07050C_A:C1_07340W_A:C1_07470C_A:FUN12:CAF16:CDC42:C1_09790C_A:DBP3:ARL3:CAS1:CDC54:ATP20:CHR1:MSH6:SEC18:MODF:C1_14050C_A:YPT52:C2_00350W_A:C2_00570W_A:C2_00700W_A:NPL6:C2_00830C_A:RFC5:KAR2:PR26:EFT2:SUV3:C2_04500W_A:SNU114:LEM3:PEX6:ATP4:RFC1:C2_06110W_A:RTA2:C2_07110C_A:MCM3:KRE30:TEF1:SMC2:RPT6:IPP1:…	36222:70577:8486:36217:32947:4170:4017:8569:5198:5524:3688:45145:4003:42626:5047:36219:4402:3684:4012:43047:3697:14:49:3680:34431:4651:35870:19001:43022:8796:36218:43531:9378:15616:43141:31493:5515:3774:5525:17025:405:32137:3877:36221:5200:4842:70336:43565:3724:3729:51539:15410:46961:32138:217:3676:42393:1102:34459:19901:8017:16740:3747:46933:45134:386:5506:19003:8320:298:42624:400:3690:3743:4309…
		16817	hydrolase activity, acting on acid anhydrides	128 out of 1369 genes, 9.3%	348 out of 6473 background genes, 5.4%	2.74e-09	0	TUF1:DUT1:CRL1:C1_01920W_A:C1_02750C_A:RAD16:ORC1:C1_03310W_A:YBN5:YPT53:C1_05780W_A:MEF2:C1_07050C_A:C1_07340W_A:C1_07470C_A:FUN12:CAF16:CDC42:C1_09790C_A:DBP3:ARL3:CAS1:CDC54:ATP20:CHR1:MSH6:SEC18:MODF:C1_14050C_A:YPT52:C2_00350W_A:C2_00570W_A:C2_00700W_A:NPL6:C2_00830C_A:RFC5:KAR2:PR26:EFT2:SUV3:C2_04500W_A:SNU114:LEM3:PEX6:ATP4:RFC1:C2_06110W_A:RTA2:C2_07110C_A:MCM3:KRE30:TEF1:SMC2:RPT6:IPP1:…	36222:70577:8486:36217:32947:4170:4017:8569:5198:5524:3688:45145:4003:42626:5047:36219:4402:3684:4012:43047:3697:14:49:3680:34431:4651:35870:19001:43022:8796:36218:43531:9378:15616:43141:31493:5515:3774:5525:17025:405:32137:3877:36221:5200:4842:70336:43565:3724:3729:51539:15410:46961:32138:217:3676:42393:1102:34459:19901:8017:16740:3747:46933:45134:386:5506:19003:8320:298:42624:400:3690:3743:4309…
		1901363	heterocyclic compound binding	443 out of 1369 genes, 32.4%	1634 out of 6473 background genes, 25.2%	8.82e-09	0	MVD:RCA1:CCT8:C1_00160C_A:TUF1:RPB11:C1_01160C_A:STB5:CRL1:RPS21:C1_01530C_A:RPB7:C1_01850C_A:C1_01920W_A:C1_01940C_A:SHA3:C1_02310C_A:C1_02430C_A:HOM6:FRS2:RAD16:MST1:ORC1:BMH1:HFL1:STR2:SKO1:C1_03790C_A:RPP1:C1_03870C_A:C1_04030W_A:C1_04040C_A:C1_04120C_A:HHF1:SSA2:URA6:PHO85:C1_04790W_A:YBN5:C1_04970W_A:C1_05230W_A:SDH1:C1_05270C_A:YPT53:C1_05650W_A:C1_05750C_A:RAD10:C1_05990C_A:C1_06590C_A:C1…	16423:8483:4712:5543:4449:8233:16747:32947:994:175:1786:988:4809:4788:19843:1882:8409:978:4813:2161:4017:3960:8569:5198:3984:8312:4638:19912:5524:3688:5527:45145:8793:4003:50815:42626:4733:1948:982:3906:4814:5047:1190:51019:4402:3684:4012:34042:4810:43047:16616:31490:50661:3887:3713:4849:3697:3725:4765:249:14:3680:49:285:1990269:16301:50177:3824:4496:16773:30976:1671:32454:31078:1135:31071:8117:4…
		97159	organic cyclic compound binding	443 out of 1369 genes, 32.4%	1640 out of 6473 background genes, 25.3%	1.65e-08	0	MVD:RCA1:CCT8:C1_00160C_A:TUF1:RPB11:C1_01160C_A:STB5:CRL1:RPS21:C1_01530C_A:RPB7:C1_01850C_A:C1_01920W_A:C1_01940C_A:SHA3:C1_02310C_A:C1_02430C_A:HOM6:FRS2:RAD16:MST1:ORC1:BMH1:HFL1:STR2:SKO1:C1_03790C_A:RPP1:C1_03870C_A:C1_04030W_A:C1_04040C_A:C1_04120C_A:HHF1:SSA2:URA6:PHO85:C1_04790W_A:YBN5:C1_04970W_A:C1_05230W_A:SDH1:C1_05270C_A:YPT53:C1_05650W_A:C1_05750C_A:RAD10:C1_05990C_A:C1_06590C_A:C1…	16423:8483:4712:5543:4449:8233:16747:32947:994:175:1786:988:4809:4788:19843:1882:8409:978:4813:2161:4017:3960:8569:5198:3984:8312:4638:19912:5524:3688:5527:45145:8793:4003:50815:42626:4733:1948:982:3906:4814:5047:1190:51019:4402:3684:4012:34042:4810:43047:16616:31490:50661:3887:3713:4849:3697:3725:4765:249:14:3680:49:285:1990269:16301:50177:3824:4496:16773:30976:1671:32454:31078:1135:31071:8117:4…
		5515	protein binding	178 out of 1369 genes, 13.0%	548 out of 6473 background genes, 8.5%	4.21e-08	0	TUP1:CCT8:VPS27:RPB11:RPB7:C1_01820C_A:C1_01850C_A:C1_02290C_A:C1_02300W_A:GGA2:BMH1:C1_03400W_A:HFL1:SKO1:C1_04230W_A:HHF1:SSA2:ESS1:HAT1:GIM5:RAD10:C1_07340W_A:PEX3:BBC1:FUN12:MED15:ENO1:TCP1:DOA1:C1_09750W_A:SHY1:C1_09790C_A:NTF2:C1_10540C_A:VPS23:C1_11110C_A:C1_11860W_A:RPN2:HSP70:DAD1:HPC2:C1_14090W_A:SET3:C2_00290W_A:CDH1:C2_00830C_A:KAR2:PEX12:RAD23:C2_02000W_A:C2_02150C_A:HEX3:C2_02720W_A…	5543:70577:70273:8379:32947:4618:43495:994:988:17024:31072:978:8022:8569:5198:5524:3688:45145:4003:50815:1948:982:51019:825:5484:3684:4402:3887:17049:3713:3697:8092:30276:46538:14:1990269:993:1671:8289:97030:1135:4458:10181:15631:5078:4534:43022:8599:45159:43531:4709:43035:15616:8762:31625:4620:5487:827:48487:31493:46983:4864:8157:5515:3774:8134:5525:8440:17025:51015:4842:1097:43565:4619:42277:37…
		5198	structural molecule activity	99 out of 1369 genes, 7.2%	257 out of 6473 background genes, 4.0%	4.34e-08	0	C1_00980W_A:C1_01090C_A:RPS21:C1_01580W_A:RPL10:C1_03280W_A:MRPL27:C1_04820C_A:SEC21:C1_06070W_A:ARC35:RPS22A:C1_06890C_A:PGA63:C1_08520C_A:C1_08920W_A:NUP188:RPL42:C1_10470W_A:C1_11880W_A:C1_12280C_A:MRPS9:ATP20:PDX1:RPL4B:C2_01030W_A:C2_01320W_A:PPE1:RPS26A:C2_01730W_A:C2_02270C_A:NSP1:RPS9B:C2_03950W_A:RPL39:MRPL10:C2_05220C_A:C2_05300C_A:C2_05710C_A:MKK2:C2_07030C_A:C2_07680W_A:C2_08380C_A:RP…	5543:32947:19843:5198:5524:3906:5078:3735:16746:5487:4784:5525:1990188:5200:1102:31386:51537:16740:46933:5506:70181:46872:30295:3682:70180:4708:5545:17056:52689:5199:4713:43130:166:30627:46982:3924:3723
		17111	nucleoside-triphosphatase activity	118 out of 1369 genes, 8.6%	327 out of 6473 background genes, 5.1%	8.36e-08	0	TUF1:CRL1:C1_01920W_A:C1_02750C_A:RAD16:ORC1:C1_03310W_A:YBN5:YPT53:C1_05780W_A:MEF2:C1_07050C_A:C1_07340W_A:C1_07470C_A:FUN12:CAF16:CDC42:C1_09790C_A:DBP3:ARL3:CAS1:CDC54:ATP20:CHR1:MSH6:SEC18:MODF:C1_14050C_A:YPT52:C2_00350W_A:C2_00570W_A:C2_00700W_A:NPL6:C2_00830C_A:RFC5:KAR2:PR26:EFT2:SUV3:C2_04500W_A:SNU114:LEM3:PEX6:ATP4:RFC1:RTA2:C2_07110C_A:MCM3:KRE30:TEF1:SMC2:RPT6:KAR3:PMS1:SUP35:SGS1:A…	70577:32947:4017:8569:5198:5524:3688:45145:4003:42626:5047:4402:3684:4012:43047:3697:14:49:3680:4651:19001:43022:43531:9378:15616:43141:31493:5515:3774:5525:17025:405:32137:5200:4842:70336:43565:3724:3729:51539:15410:46961:32138:217:3676:42393:1102:34459:19901:8017:16740:3747:46933:386:5506:19003:8320:42624:400:3690:3743:4222:287:10485:43140:3689:3682:4652:3918:42623:4004:8859:17108:15662:8094:36…
		16887	ATPase activity	87 out of 1369 genes, 6.4%	231 out of 6473 background genes, 3.6%	2.42e-06	0	C1_01920W_A:C1_02750C_A:RAD16:ORC1:C1_03310W_A:YBN5:C1_05780W_A:C1_07050C_A:C1_07340W_A:CAF16:C1_09790C_A:DBP3:CAS1:CDC54:ATP20:CHR1:MSH6:SEC18:MODF:C1_14050C_A:C2_00350W_A:C2_00570W_A:C2_00700W_A:NPL6:C2_00830C_A:RFC5:KAR2:SUV3:C2_04500W_A:LEM3:PEX6:ATP4:RFC1:RTA2:C2_07110C_A:MCM3:KRE30:SMC2:KAR3:PMS1:SGS1:ARP9:C3_01560W_A:RAD50:C3_04230W_A:SNF5:C3_05160C_A:DYN1:PRP5:C3_06830C_A:SUB2:ATP2:MDN1:H…	70577:4017:8569:5198:5524:3688:45145:4003:42626:4402:3684:4012:43047:3697:14:49:3680:4651:43531:9378:15616:43141:31493:3774:5525:17025:405:32137:4842:70336:43565:3724:3729:51539:15410:46961:32138:217:3676:1102:34459:19901:8017:16740:46933:386:5506:42624:400:3690:4222:287:10485:43140:3689:3682:4652:3918:42623:4004:8859:17108:15662:8094:3677:3700:42162:16887:404:51880:51082:5388:8270:182:4386:30674…
		3735	structural constituent of ribosome	67 out of 1369 genes, 4.9%	163 out of 6473 background genes, 2.5%	2.71e-06	0	C1_00980W_A:C1_01090C_A:RPS21:C1_01580W_A:RPL10:C1_03280W_A:MRPL27:C1_04820C_A:C1_06070W_A:RPS22A:C1_06890C_A:C1_08520C_A:C1_08920W_A:RPL42:C1_10470W_A:C1_11880W_A:C1_12280C_A:MRPS9:RPL4B:C2_01030W_A:PPE1:RPS26A:C2_02270C_A:RPS9B:C2_03950W_A:RPL39:MRPL10:C2_05300C_A:C2_05710C_A:C2_07030C_A:C2_07680W_A:RPL3:RPS24:C3_00450C_A:C3_01850W_A:RPL9B:C3_06240C_A:RPL30:IMG2:UBI3:C5_00820W_A:C5_01050C_A:MPR…	19843:3906:3735:4784:31386:16740:70181:46872:70180:52689:166:30627:3723
		16772	transferase activity, transferring phosphorus-containing groups	99 out of 1369 genes, 7.2%	291 out of 6473 background genes, 4.5%	8.72e-05	0	RPB11:C1_01250W_A:RPB7:SHA3:GAL7:HFL1:URA6:PHO85:GPI7:C1_05230W_A:C1_05650W_A:POL32:C1_05980W_A:C1_06710W_A:NPR1:C1_08540C_A:GCD6:PFK26:ERG12:C1_09790C_A:UBA4:MCD4:RBK1:C1_12820C_A:MUQ1:C2_01070W_A:BCY1:FAB1:C2_03760C_A:SSN3:C2_04340C_A:C2_04360W_A:KIC1:CDC15:CDC7:CDC19:MKK2:DBF2:RCK2:RPA12:TOR1:ALG7:C2_08860W_A:IPK2:AKL1:HRK1:C3_01570W_A:RAD50:C3_02260C_A:POL1:FAS2:C3_05420W_A:PBS2:POS5:PCT1:C4_…	4712:8963:4316:30955:4618:4105:16597:4788:1882:4017:42292:8108:19912:5524:3688:4402:825:4810:43047:3887:8603:4849:3697:3725:4765:285:16301:4496:16773:8193:4749:4743:5085:1054:50464:70095:5078:8796:4862:3881:3975:4430:4709:51377:3872:3855:827:1056:46983:5515:42736:3951:8440:4306:3877:43565:3729:824:4747:8353:16772:3968:30332:4140:34459:3779:3727:4072:3866:4674:3690:3743:72371:9041:287:46872:4631:1…
		16875	ligase activity, forming carbon-oxygen bonds	22 out of 1369 genes, 1.6%	36 out of 6473 background genes, 0.6%	0.00013	0	C1_01530C_A:FRS2:MST1:C1_04030W_A:C1_12240C_A:WRS1:KRS1:TYS1:THS1:C6_00390W_A:C6_01050W_A:NAM2:ALA1:GLN4:GUS1:C7_03660C_A:DED81:CDC60:FRS1:DPS1-1:CR_03350C_A:CR_03400W_A	4813:2161:5524:4814:49:4826:4823:4830:4824:3729:4815:3676:4827:4818:4828:4831:287:4816:4819:4829:4822:3723
		16876	ligase activity, forming aminoacyl-tRNA and related compounds	22 out of 1369 genes, 1.6%	36 out of 6473 background genes, 0.6%	0.00013	0	C1_01530C_A:FRS2:MST1:C1_04030W_A:C1_12240C_A:WRS1:KRS1:TYS1:THS1:C6_00390W_A:C6_01050W_A:NAM2:ALA1:GLN4:GUS1:C7_03660C_A:DED81:CDC60:FRS1:DPS1-1:CR_03350C_A:CR_03400W_A	4813:2161:5524:4814:49:4826:4823:4830:4824:3729:4815:3676:4827:4818:4828:4831:287:4816:4819:4829:4822:3723
		4812	aminoacyl-tRNA ligase activity	22 out of 1369 genes, 1.6%	36 out of 6473 background genes, 0.6%	0.00013	0	C1_01530C_A:FRS2:MST1:C1_04030W_A:C1_12240C_A:WRS1:KRS1:TYS1:THS1:C6_00390W_A:C6_01050W_A:NAM2:ALA1:GLN4:GUS1:C7_03660C_A:DED81:CDC60:FRS1:DPS1-1:CR_03350C_A:CR_03400W_A	4813:2161:5524:4814:49:4826:4823:4830:4824:3729:4815:3676:4827:4818:4828:4831:287:4816:4819:4829:4822:3723
		51082	unfolded protein binding	29 out of 1369 genes, 2.1%	62 out of 6473 background genes, 1.0%	0.00359	0	CCT8:C1_02300W_A:SSA2:GIM5:TCP1:SHY1:C1_11110C_A:HSP70:C1_14090W_A:KAR2:CCT5:PHO86:JEM1:C3_02820C_A:EGD2:C3_05120C_A:TSA1:TIM10:CSH3:C4_04090C_A:CCT6:C7_01350C_A:HSP90:YDJ1:CR_04650W_A:SIS1:HSP104:VMA22:CR_10410C_A	70273:8379:31072:5524:1671:15631:43022:43531:48487:5515:42277:70300:8565:42623:80025:16887:51082:51787:51087:32266:5509:30985:3723
		3729	mRNA binding	53 out of 1369 genes, 3.9%	147 out of 6473 background genes, 2.3%	0.01238	0	C1_00160C_A:C1_01850C_A:C1_02430C_A:C1_04040C_A:C1_04970W_A:C1_11860W_A:C1_11900C_A:RPG1A:C2_02420C_A:C2_02770W_A:C2_04570W_A:IMH3:PES1:SUP35:SOF1:C3_00730W_A:C3_01520C_A:C3_01560W_A:C3_02040C_A:SEN1:C3_06830C_A:GCY1:KRS1:RAT1:MDH1-1:TYS1:C4_03150W_A:EDC3:C4_06210C_A:NOP1:C4_06850C_A:C5_00840W_A:C5_01140C_A:SMD3:GRE3:SHE3:NAM2:PAD1:C6_04290W_A:GLN4:GUS1:C7_01030C_A:BEM2:PFK2:POT1:PWP2:CR_01820W_A…	2161:5524:3887:3697:5085:70095:4534:3872:4823:5525:4824:3729:5096:3676:4818:8017:3747:3690:4831:30515:3743:1990259:3988:1990042:3682:16831:4004:8649:30554:16887:19904:4061:4819:30060:70006:8270:4032:4386:50072:30145:32866:3938:8026:50660:166:150:45131:1965:46982:17150:3924:8310
		44822	poly(A) RNA binding	53 out of 1369 genes, 3.9%	147 out of 6473 background genes, 2.3%	0.01238	0	C1_00160C_A:C1_01850C_A:C1_02430C_A:C1_04040C_A:C1_04970W_A:C1_11860W_A:C1_11900C_A:RPG1A:C2_02420C_A:C2_02770W_A:C2_04570W_A:IMH3:PES1:SUP35:SOF1:C3_00730W_A:C3_01520C_A:C3_01560W_A:C3_02040C_A:SEN1:C3_06830C_A:GCY1:KRS1:RAT1:MDH1-1:TYS1:C4_03150W_A:EDC3:C4_06210C_A:NOP1:C4_06850C_A:C5_00840W_A:C5_01140C_A:SMD3:GRE3:SHE3:NAM2:PAD1:C6_04290W_A:GLN4:GUS1:C7_01030C_A:BEM2:PFK2:POT1:PWP2:CR_01820W_A…	2161:5524:3887:3697:5085:70095:4534:3872:4823:5525:4824:3729:5096:3676:4818:8017:3747:3690:4831:30515:3743:1990259:3988:1990042:3682:16831:4004:8649:30554:16887:19904:4061:4819:30060:70006:8270:4032:4386:50072:30145:32866:3938:8026:50660:166:150:45131:1965:46982:17150:3924:8310
		16874	ligase activity	37 out of 1369 genes, 2.7%	92 out of 6473 background genes, 1.4%	0.01492	0	C1_01530C_A:FRS2:MST1:C1_03180W_A:C1_04030W_A:UBA2:GUA1:ADE12:UBA4:C1_12240C_A:WRS1:C2_04380C_A:UBA1:KRS1:TYS1:THS1:C5_04710W_A:C6_00390W_A:FAT1:C6_01050W_A:NAM2:ALA1:GLN4:GUS1:C7_03660C_A:DED81:ADE1:ARG1:CPA2:CDC60:FRS1:CR_02770C_A:DPS1-1:CR_03350C_A:CR_03400W_A:APG7:GSH2	4813:2161:42292:5524:3688:4814:16415:49:4826:50464:50567:19948:4823:4830:5525:4824:5324:3729:4815:3676:4827:4818:4839:4828:4831:287:4816:4055:3922:4363:4019:4819:4792:4639:4829:61483:19778:31957:16874:4088:4326:19779:70733:4822:3723
		3682	chromatin binding	42 out of 1369 genes, 3.1%	110 out of 6473 background genes, 1.7%	0.01911	0	C1_02310C_A:ORC1:HAT1:C1_05780W_A:C1_07340W_A:C1_07830C_A:CEF1:ADA2:TOS4:SNT1:CDC54:HPC2:NCB2:TBF1:C2_07110C_A:MCM3:TAF4:SMC2:GCN4:C3_01770C_A:C3_03330C_A:ORC3:POL1:NUP85:TAF60:BAS1:BRN1:CDC68:YBL053:C5_02620C_A:C5_03830C_A:C5_04640C_A:DNA2:ARP4:C6_03550C_A:C7_00910C_A:SPT6:SWC4:MCM2:CR_04450C_A:CDC45:DCP2	32947:1786:988:1882:978:5524:3688:45145:4003:982:1190:4402:31490:3887:3697:3713:14:3680:97030:1135:43035:15616:31493:1990188:1084:43565:3729:42803:217:42393:1073:1102:19901:1129:386:3690:981:10485:43140:3682:1191:16407:17108:35064:1046:3677:42162:3700:16887:8270:182:4386:17111:17056:30674:50072:31491:991:30145:1132:17116:43142:43130:1047:166:3714:1990163:16788:46982
		3676	nucleic acid binding	278 out of 1369 genes, 20.3%	1082 out of 6473 background genes, 16.7%	0.03147	0	RCA1:C1_00160C_A:TUF1:RPB11:C1_01160C_A:STB5:RPS21:RPB7:C1_01850C_A:C1_01940C_A:C1_02310C_A:C1_02430C_A:FRS2:RAD16:ORC1:BMH1:HFL1:SKO1:RPP1:C1_04030W_A:C1_04040C_A:C1_04120C_A:HHF1:C1_04790W_A:C1_04970W_A:C1_05230W_A:C1_05270C_A:C1_05750C_A:RAD10:C1_06590C_A:SUI2:PUT3:C1_07050C_A:C1_07340W_A:C1_07470C_A:FUN12:NTG1:DIP2:GCD6:C1_08660C_A:C1_09070W_A:CTA8:CEF1:ADE12:C1_09790C_A:DBP3:C1_10470W_A:ADA2…	16423:5543:16747:994:175:1786:988:4809:19843:1882:8409:978:4813:2161:4017:3960:8312:5524:3688:45145:4003:50815:1948:982:3906:1190:51019:4402:3684:34042:4810:43047:31490:3887:3713:3697:3725:14:3680:49:1990269:3824:1671:32454:1135:9982:5085:4826:1054:16706:4540:70095:4534:43022:3735:5048:5507:9378:43035:16149:3872:30337:4823:5487:1056:43141:46983:4864:10521:5515:34039:5525:8821:17025:34043:405:3213…
		8094	DNA-dependent ATPase activity	28 out of 1369 genes, 2.0%	65 out of 6473 background genes, 1.0%	0.03433	0	C1_02750C_A:RAD16:C1_03310W_A:C1_05780W_A:C1_07050C_A:CAS1:CDC54:C1_14050C_A:C2_00350W_A:C2_00570W_A:NPL6:C2_00830C_A:RFC5:RFC1:MCM3:SGS1:ARP9:SNF5:TOP2:C4_06800W_A:RCF3:DNA2:ARP4:RFC2:RVB2:RAD51:MCM2:CR_04720C_A	70577:5524:3688:45145:4003:4402:3684:43047:3697:14:9378:15616:43141:31493:405:4842:43565:3676:1102:19901:400:10485:43140:3689:3682:3918:17108:8094:3677:3700:42162:16887:8270:4386:17116:43142:166:1990163:403:150:3691:3723
		4386	helicase activity	35 out of 1369 genes, 2.6%	89 out of 6473 background genes, 1.4%	0.04293	0	RAD16:C1_07050C_A:C1_07340W_A:C1_07470C_A:C1_09790C_A:DBP3:CAS1:CDC54:CHR1:C1_14050C_A:C2_00350W_A:SUV3:C2_04500W_A:MCM3:SGS1:C3_01310W_A:C3_01560W_A:C3_04230W_A:SEN1:C3_05160C_A:PRP5:C3_06830C_A:SUB2:HCA4:MPH1:C4_06800W_A:HAS1:DNA2:C6_01040C_A:ARP4:RVB2:CR_02590C_A:MCM2:CR_04720C_A:CR_07750C_A	5524:3688:45145:4003:4402:3684:3697:14:9378:43141:31493:17025:405:4842:70336:43565:3724:3729:3676:34459:19901:386:400:10485:43140:3682:4652:4004:8859:17108:8094:3677:3700:42162:16887:19904:8270:182:4386:30674:31491:43138:8026:17116:43142:8186:1990163:403:3723
		42393	histone binding	19 out of 1369 genes, 1.4%	38 out of 6473 background genes, 0.6%	0.04844	0	TUP1:HAT1:SET3:C2_00830C_A:NBN1:C2_05510C_A:PHO23:C4_02600C_A:CDC68:C5_02620C_A:CAC2:C5_04640C_A:C6_01850W_A:ARP4:SPT6:CR_00750C_A:PST3:CR_05890C_A:CR_07230W_A	70577:5524:4402:10181:15616:31493:42393:1073:10485:43140:3682:42826:1191:80025:35064:8270:36033:17111:31491:991:43130:3714:51864:10698:16788
		4177	aminopeptidase activity	10 out of 1369 genes, 0.7%	14 out of 6473 background genes, 0.2%	0.04916	0	LKH1:C1_10820C_A:C1_14450C_A:APE3:C3_03560W_A:C4_06850C_A:DAP2:C6_03960W_A:C6_04080W_A:STE13	8239:4177:4463:3729:8236:70006:8270:30145:4301:16805:8237
		42623	ATPase activity, coupled	59 out of 1369 genes, 4.3%	178 out of 6473 background genes, 2.7%	0.07213	0.0018	C1_01920W_A:C1_02750C_A:RAD16:C1_03310W_A:C1_05780W_A:C1_07050C_A:C1_09790C_A:DBP3:CAS1:CDC54:ATP20:CHR1:C1_14050C_A:C2_00350W_A:C2_00570W_A:NPL6:C2_00830C_A:RFC5:SUV3:LEM3:ATP4:RFC1:RTA2:MCM3:SGS1:ARP9:C3_01560W_A:C3_04230W_A:SNF5:C3_05160C_A:PRP5:C3_06830C_A:SUB2:ATP2:HCA4:C4_03110W_A:MPH1:VMA8:TOP2:C4_06800W_A:RCF3:HAS1:DNA2:C6_01040C_A:ARP4:ATM1:PMR1:RFC2:RVB2:HSP90:PEX1:PXA1:VMA4:RAD51:CR_02…	70577:5198:5524:3688:45145:4003:42626:4402:3684:4012:43047:3697:14:43531:9378:15616:43141:31493:405:4842:70336:43565:3724:3729:15410:46961:3676:1102:34459:19901:46933:386:400:287:10485:43140:3689:3682:4652:3918:42623:4004:8859:17108:15662:8094:3677:3700:42162:16887:51082:5388:8270:4386:30674:51087:43138:8026:17116:43142:166:8186:1990163:403:150:5509:19829:46982:3691:3723
		16773	phosphotransferase activity, alcohol group as acceptor	55 out of 1369 genes, 4.0%	164 out of 6473 background genes, 2.5%	0.08635	0.0022	SHA3:PHO85:C1_05650W_A:C1_05980W_A:C1_06710W_A:NPR1:C1_08540C_A:PFK26:ERG12:RBK1:BCY1:FAB1:C2_03760C_A:SSN3:C2_04340C_A:C2_04360W_A:KIC1:CDC15:CDC7:CDC19:MKK2:DBF2:RCK2:TOR1:C2_08860W_A:IPK2:AKL1:HRK1:C3_01570W_A:C3_02260C_A:C3_05420W_A:PBS2:POS5:ARO1:ERG8:C4_02620C_A:BUB1:SSK2:SNF1:PIKA:C5_02440C_A:DUN1:C5_05130C_A:TRA1:TEL1:RIM15:PFK2:BCK1:PRK1:HST7:CR_04230W_A:CR_06040W_A:STT4:MPS1:CKA1	4712:30955:19912:5524:4402:825:8603:4849:4765:285:16301:4496:16773:4743:70095:5078:4862:4430:4709:3872:3855:827:42736:3951:8440:3729:824:4747:8353:30332:4140:3779:3866:4674:72371:287:46872:4631:10485:3873:823:46316:4764:50262:4708:42162:8144:4679:1901916:30674:4691:5199:4713:3856:32266:156:35004:4672:4693
		70035	purine NTP-dependent helicase activity	28 out of 1369 genes, 2.0%	68 out of 6473 background genes, 1.1%	0.08957	0.0021	C1_07050C_A:C1_09790C_A:DBP3:CAS1:CDC54:CHR1:C1_14050C_A:SUV3:MCM3:SGS1:C3_01560W_A:C3_04230W_A:C3_05160C_A:PRP5:C3_06830C_A:SUB2:HCA4:MPH1:C4_06800W_A:HAS1:DNA2:C6_01040C_A:ARP4:RVB2:CR_02590C_A:MCM2:CR_04720C_A:CR_07750C_A	5524:3688:45145:4003:4402:3684:3697:14:43141:31493:405:70336:43565:3724:3729:3676:34459:19901:386:10485:43140:3682:4652:4004:8859:17108:3677:3700:42162:16887:8270:30674:43138:8026:17116:43142:8186:1990163:3723
		8026	ATP-dependent helicase activity	28 out of 1369 genes, 2.0%	68 out of 6473 background genes, 1.1%	0.08957	0.0021	C1_07050C_A:C1_09790C_A:DBP3:CAS1:CDC54:CHR1:C1_14050C_A:SUV3:MCM3:SGS1:C3_01560W_A:C3_04230W_A:C3_05160C_A:PRP5:C3_06830C_A:SUB2:HCA4:MPH1:C4_06800W_A:HAS1:DNA2:C6_01040C_A:ARP4:RVB2:CR_02590C_A:MCM2:CR_04720C_A:CR_07750C_A	5524:3688:45145:4003:4402:3684:3697:14:43141:31493:405:70336:43565:3724:3729:3676:34459:19901:386:10485:43140:3682:4652:4004:8859:17108:3677:3700:42162:16887:8270:30674:43138:8026:17116:43142:8186:1990163:3723
	C. albicans GO Terms: Function (3' UTR of between 100-149 bases)
		GOID	GO_term	Cluster frequency	Background frequency	Corrected P-value	False discovery rate	Gene(s) annotated to the term	Directly Annotated GOID List
		5488	binding	360 out of 746 genes, 48.3%	2423 out of 6473 background genes, 37.4%	4.71e-08	0	C1_00910W_A:MBF1:C1_01190C_A:SIZ1:RPS42:LSC1:SWI4:C1_01860W_A:CYS4:C1_01900C_A:AGE3:TIF34:LYS2:C1_02850W_A:C1_02900C_A:CDC73:GOR1:ARO80:C1_03260W_A:C1_03360W_A:AGE1:SUA71:HTA2:CDC3:NOP4:ATP1:C1_04630C_A:CUE5:C1_05360C_A:MTM1:FAL1:RIM1:CHS7:C1_06040W_A:GLT1:C1_06630W_A:NOP6:CCS1:PHO15:RME1:C1_07390W_A:SKP1:C1_07690C_A:ADE5,7:PFY1:DRG1:C1_08340C_A:GCR3:ERG1:C1_08680C_A:MSS116:ARG5,6:TFA1:PET100:PDC…	48027:45142:5543:31418:16531:5516:4449:70577:4396:4617:70273:16747:32947:43495:16597:5094:19843:31072:978:4035:4774:4612:2161:15238:3785:5198:8312:3984:19912:5524:3688:4362:50815:45118:42626:4003:62:15266:1948:4733:982:4413:5047:4402:35091:3684:4012:43047:30246:4697:47964:31490:50661:3887:17049:3697:4641:3713:4470:8092:30276:15244:51219:4177:49:8574:4602:1990269:3992:3824:993:15450:31078:4075:976…
		5515	protein binding	107 out of 746 genes, 14.3%	548 out of 6473 background genes, 8.5%	4.13e-06	0	C1_01860W_A:AGE3:CDC73:C1_03360W_A:SUA71:HTA2:CUE5:CHS7:C1_06040W_A:C1_07390W_A:C1_07690C_A:PFY1:TFA1:PET100:CDC48:RTG3:CTA3:SPA2:BNI1:TYE7:RPN1:YBP1:PAM16:DPB4:POM152:SLA1:SNF2:ENT3:HOM2:POB3:INO4:TAF14:C2_04620W_A:URE2:C2_06770W_A:GLE1:RSP5:C2_08630C_A:KIS1:SGT1:CCT2:RAP1:GPD1:TIF11:CSE4:C3_00950C_A:APL2:HTB1:C3_05720C_A:ASE1:DOT1:ISW2:C3_06800C_A:C3_07680W_A:SWI1:C4_00460C_A:TOA2:C4_02340W_A:G…	45142:5543:5516:70577:32947:43495:31072:3785:5198:5524:4362:50815:4003:1948:982:4402:35091:31490:50661:3887:17049:3697:8092:30276:51219:8574:4602:1990269:993:97602:8289:1068:4866:5053:5085:15631:15035:5078:43022:8599:19788:15616:1012:31625:1139:30159:31493:46983:5515:8134:5525:1089:17025:61630:774:51015:70615:4842:1097:43565:3729:9055:33613:42803:48306:70064:5096:1085:3942:43024:42393:30332:31151…
		44877	macromolecular complex binding	46 out of 746 genes, 6.2%	201 out of 6473 background genes, 3.1%	0.00139	0	SWI4:C1_01860W_A:CDC73:C1_03360W_A:SUA71:C1_05360C_A:C1_06630W_A:TFA1:CDC6:DPB4:SNF2:POB3:C2_04620W_A:C2_06770W_A:C2_08630C_A:RAP1:TIF11:YCG1:C3_04810C_A:C3_05720C_A:ASE1:C3_06050C_A:DOT1:ISW2:C3_07680W_A:MLP1:ABP1:C4_04870C_A:C4_05230C_A:COF1:C5_02750C_A:C6_01920C_A:SAC6:C7_00520W_A:ASC1:CRN1:C7_03850W_A:CR_01120C_A:HDA1:CR_03910C_A:MTG2:CR_05910W_A:CDC28:CR_07080W_A:CR_07660C_A:CR_09490W_A	45142:70577:32947:3785:5524:3688:4003:982:5047:31490:3887:3697:8574:1990269:993:31078:43022:15616:1012:1139:31493:5525:1089:17025:51015:70615:1097:43565:4407:3729:43024:42393:31151:8301:1102:34459:8017:1129:3690:3743:287:987:983:3682:4871:4652:43023:8094:35064:3677:3700:42162:51575:16887:31492:51880:5092:43021:5080:31369:8270:182:33592:4386:30674:31491:1132:1094:1076:70463:1077:4713:3714:5509:469…
		993	RNA polymerase II core binding	9 out of 746 genes, 1.2%	14 out of 6473 background genes, 0.2%	0.00206	0	C1_01860W_A:CDC73:SUA71:TFA1:C2_08630C_A:C6_01920C_A:C7_00520W_A:CR_05910W_A:CDC28	45142:5524:3697:1990269:993:1012:1139:1089:17025:1097:3729:42393:1129:983:3682:3700:8270:1076:4713:4693
		1098	basal transcription machinery binding	11 out of 746 genes, 1.5%	21 out of 6473 background genes, 0.3%	0.00271	0	C1_01860W_A:CDC73:SUA71:TFA1:C2_08630C_A:RAP1:C6_01920C_A:C7_00520W_A:RTF1:CR_05910W_A:CDC28	45142:5524:982:3697:1990269:993:1012:1139:1089:17025:1097:3729:42393:8301:1129:987:983:3682:3677:3700:42162:31492:51880:8270:1132:1094:1076:4713:4693:3723
		1099	basal RNA polymerase II transcription machinery binding	11 out of 746 genes, 1.5%	21 out of 6473 background genes, 0.3%	0.00271	0	C1_01860W_A:CDC73:SUA71:TFA1:C2_08630C_A:RAP1:C6_01920C_A:C7_00520W_A:RTF1:CR_05910W_A:CDC28	45142:5524:982:3697:1990269:993:1012:1139:1089:17025:1097:3729:42393:8301:1129:987:983:3682:3677:3700:42162:31492:51880:8270:1132:1094:1076:4713:4693:3723
		43168	anion binding	115 out of 746 genes, 15.4%	685 out of 6473 background genes, 10.6%	0.00452	0	C1_01190C_A:LYS2:CDC73:C1_03260W_A:C1_03360W_A:AGE1:CDC3:ATP1:C1_04630C_A:MTM1:FAL1:ADE5,7:PFY1:DRG1:C1_08340C_A:ERG1:MSS116:CBK1:CDC48:C1_11080W_A:GIN4:SAM2:GAD1:C1_11930W_A:CDC6:SEC2:C1_13060C_A:LCB2:MSF1:SNF2:ENT3:C2_02950W_A:ROM2:SCH9:SSY1:CAK1:RHO3:MAK5:GSP1:VAS1:YPT72:GLE1:RHO2:RSP5:GTR1:C2_08630C_A:CCT2:DBP5:NDE1:PKC1:CMK1:CDR1:C3_05720C_A:NOG1:ISW2:DLD2:C3_07550C_A:C4_00460C_A:ILV6:NCP1:I…	45142:5543:31418:70577:4396:70273:16597:4774:4612:2161:15238:3785:5198:8312:3984:19912:5524:3688:4362:50815:45118:42626:4003:62:4733:4413:5047:35091:4012:4697:31490:50661:17049:3697:4641:30276:15244:49:8574:1990269:3992:993:4075:4458:5089:10181:4826:5085:16706:15631:4478:43022:5048:8599:4107:15616:4637:5215:8762:16530:31543:4043:5487:5548:15431:4830:5525:1089:61630:4824:4123:5324:15421:70615:4842…
		36094	small molecule binding	118 out of 746 genes, 15.8%	712 out of 6473 background genes, 11.0%	0.00638	0	C1_01190C_A:CYS4:LYS2:CDC73:GOR1:C1_03260W_A:C1_03360W_A:CDC3:NOP4:ATP1:C1_04630C_A:FAL1:NOP6:ADE5,7:DRG1:ERG1:MSS116:ARG5,6:CBK1:CDC48:C1_11050W_A:C1_11080W_A:GIN4:SAM2:SER33:CDC6:C1_13060C_A:RBE1:MSF1:SNF2:HOM2:IDH2:SCH9:SSY1:CAK1:RHO3:MAK5:C2_05540C_A:GSP1:VAS1:YPT72:GLE1:RHO2:GTR1:C2_08630C_A:CCT2:GPD1:DBP5:C3_02020W_A:NDE1:PKC1:CMK1:C3_05150W_A:CDR1:C3_05720C_A:NOG1:REV3:ISW2:NOP13:DLD2:C3_0…	45142:5543:31418:4449:70577:4396:4617:16597:19843:4774:4612:2161:15238:5198:8312:3984:19912:5524:3688:4362:50815:45118:42626:4003:62:4733:4413:5047:3684:4012:4697:31490:47964:50661:3887:3697:4641:4470:15244:49:8574:1990269:993:4075:4458:1068:10181:4826:16706:3991:4478:43022:5048:8599:4107:32934:15616:4637:5215:8762:31543:4043:5548:1056:46983:15431:4830:5525:1089:61630:774:4824:15421:70615:4842:41…
		32403	protein complex binding	24 out of 746 genes, 3.2%	87 out of 6473 background genes, 1.3%	0.01513	0	C1_01860W_A:CDC73:SUA71:TFA1:DPB4:SNF2:POB3:C2_06770W_A:C2_08630C_A:RAP1:C3_05720C_A:ASE1:DOT1:ISW2:C3_07680W_A:ABP1:COF1:C5_02750C_A:C6_01920C_A:SAC6:C7_00520W_A:CRN1:CR_05910W_A:CDC28	45142:70577:3785:5524:982:3887:3697:8574:1990269:993:15616:1012:1139:31493:1089:17025:51015:1097:43565:3729:42393:31151:8301:1102:8017:1129:3690:987:983:3682:8094:3677:3700:42162:31492:51880:8270:4386:30674:31491:1132:1094:1076:70463:4713:3714:5509:4693:46982
		43175	RNA polymerase core enzyme binding	9 out of 746 genes, 1.2%	17 out of 6473 background genes, 0.3%	0.01818	0	C1_01860W_A:CDC73:SUA71:TFA1:C2_08630C_A:C6_01920C_A:C7_00520W_A:CR_05910W_A:CDC28	45142:5524:3697:1990269:993:1012:1139:1089:17025:1097:3729:42393:1129:983:3682:3700:8270:1076:4713:4693
		70063	RNA polymerase binding	9 out of 746 genes, 1.2%	17 out of 6473 background genes, 0.3%	0.01818	0	C1_01860W_A:CDC73:SUA71:TFA1:C2_08630C_A:C6_01920C_A:C7_00520W_A:CR_05910W_A:CDC28	45142:5524:3697:1990269:993:1012:1139:1089:17025:1097:3729:42393:1129:983:3682:3700:8270:1076:4713:4693
		51219	phosphoprotein binding	6 out of 746 genes, 0.8%	8 out of 6473 background genes, 0.1%	0.02705	0	CDC73:URE2:C2_08630C_A:C7_00520W_A:RTF1:CDC4	45142:50815:51219:4602:1990269:993:1089:61630:4842:4364:983:3682:3677:30674:1076:43130:3714:3723
		97159	organic cyclic compound binding	233 out of 746 genes, 31.2%	1640 out of 6473 background genes, 25.3%	0.03421	0	C1_00910W_A:MBF1:C1_01190C_A:SIZ1:RPS42:SWI4:C1_01860W_A:CYS4:C1_01900C_A:TIF34:C1_02850W_A:C1_02900C_A:GOR1:ARO80:C1_03260W_A:C1_03360W_A:HTA2:CDC3:NOP4:ATP1:C1_04630C_A:C1_05360C_A:MTM1:FAL1:RIM1:NOP6:RME1:SKP1:ADE5,7:DRG1:GCR3:ERG1:MSS116:ARG5,6:TFA1:PDC2:CBK1:C1_10620W_A:RPA190:CDC48:RTG3:C1_11050W_A:C1_11080W_A:GIN4:KRR1:SAM2:GAR1:GAD1:SER33:CDC6:C1_13060C_A:TYE7:C1_13260W_A:LCB2:RBE1:NDT80:…	48027:45142:5543:31418:4449:70577:4396:4617:19843:4774:978:4612:2161:15238:5198:8312:19912:5524:3688:4362:45118:42626:4003:4733:982:4413:5047:3684:4012:43047:4697:31490:47964:50661:3887:3697:4641:3713:4470:15244:4177:49:8574:1990269:3992:3824:993:4075:1135:4458:1068:10181:9982:4826:19789:16706:1054:4540:3991:4478:43022:3735:5048:8599:4107:32934:15616:1012:4637:5215:8762:16530:16149:31543:4645:113…
		1901363	heterocyclic compound binding	232 out of 746 genes, 31.1%	1634 out of 6473 background genes, 25.2%	0.03746	0	C1_00910W_A:MBF1:C1_01190C_A:SIZ1:RPS42:SWI4:C1_01860W_A:CYS4:C1_01900C_A:TIF34:C1_02850W_A:C1_02900C_A:GOR1:ARO80:C1_03260W_A:C1_03360W_A:HTA2:CDC3:NOP4:ATP1:C1_04630C_A:C1_05360C_A:MTM1:FAL1:RIM1:NOP6:RME1:SKP1:ADE5,7:DRG1:GCR3:ERG1:MSS116:ARG5,6:TFA1:PDC2:CBK1:C1_10620W_A:RPA190:CDC48:RTG3:C1_11050W_A:C1_11080W_A:GIN4:KRR1:SAM2:GAR1:GAD1:SER33:CDC6:C1_13060C_A:TYE7:C1_13260W_A:LCB2:NDT80:RFA1:…	48027:45142:5543:31418:4449:70577:4396:4617:19843:4774:978:4612:2161:15238:5198:8312:19912:5524:3688:4362:45118:42626:4003:4733:982:4413:5047:3684:4012:43047:4697:31490:47964:50661:3887:3697:4641:3713:4470:15244:4177:49:8574:1990269:3992:3824:993:4075:1135:4458:1068:10181:9982:4826:19789:16706:1054:4540:3991:4478:43022:3735:5048:8599:4107:15616:1012:4637:5215:8762:16530:16149:31543:4645:1139:5487…
		16740	transferase activity	122 out of 746 genes, 16.4%	770 out of 6473 background genes, 11.9%	0.03841	0.0013	C1_00860W_A:HMT1:SIZ1:MNN11:NGG1:C1_03600W_A:ELA1:BET4:C1_05360C_A:C1_05930C_A:C1_06040W_A:BUD16:SKP1:ADE4:ARG5,6:RPA34:MNN12:CBK1:RPA190:C1_11080W_A:CHO1:GIN4:SAM2:GUP1:LCB2:C1_13950C_A:C1_14170W_A:DPB4:NOT3:PRS1:SCT2:C2_02950W_A:YIM1:SCH9:BAT21:CAK1:URE2:C2_04820W_A:COQ5:GWT1:PMT4:ARE2:LPT1:PRS5:RSP5:C2_08840W_A:KIS1:ETR1:C3_00400C_A:SCT1:ALG8:GFA1:KRE5:C3_03760W_A:MEU1:PKC1:CMK1:C3_05300C_A:DI…	828:4149:4396:16747:4845:8242:16597:4809:4307:47499:43334:3984:19912:5524:4044:35242:3688:47184:50815:8176:4413:3684:35091:4402:4662:30246:4697:3887:3697:3983:19702:51219:4801:4602:3992:993:4605:97602:4749:19789:44020:1054:3991:4478:4169:4360:19776:19788:4856:31625:3872:4645:4305:827:30159:107:1056:8276:31493:4144:8440:61630:31278:4806:4842:16429:43565:3729:3676:3942:42393:8374:30332:31151:4359:3…
	C. albicans GO Terms: Function (3' UTR of between 150-199 bases)
		GOID	GO_term	Cluster frequency	Background frequency	Corrected P-value	False discovery rate	Gene(s) annotated to the term	Directly Annotated GOID List
		3735	structural constituent of ribosome	22 out of 332 genes, 6.6%	163 out of 6473 background genes, 2.5%	0.00737	0	RPL16A:MRP20:C1_02330C_A:RPP1A:RPS16A:C1_04370C_A:MRPL37:RPS14B:RPS23A:RPS17B:RPL37B:C2_01740C_A:C2_07190C_A:MRPL33:RPS15:MRP17:RPS5:C5_03410C_A:RPP1B:RPS30:RPL15A:RPP2A	3735:70181:30295:19843:3723
		5198	structural molecule activity	29 out of 332 genes, 8.7%	257 out of 6473 background genes, 4.0%	0.01279	0	RPL16A:MRP20:C1_02330C_A:RPP1A:RPS16A:C1_04370C_A:MRPL37:RPS14B:RPS23A:TAF145:RPS17B:RPL37B:KIS2:C2_01740C_A:C2_07190C_A:MRPL33:RPS15:MRP17:RPS5:C5_03410C_A:CHC1:C6_04120C_A:RPP1B:RPS30:RPL15A:ARC15:RPP2A:RPN7:CR_09520C_A	3735:19843:51010:30159:4402:5200:30295:70181:3729:3682:5198:17025:32947:3700:8017:3723:4679
		22890	inorganic cation transmembrane transporter activity	17 out of 332 genes, 5.1%	115 out of 6473 background genes, 1.8%	0.01955	0	ATP7:C1_10200C_A:ATP18:C2_02180W_A:ZRT2:VMA7:QCR8:COX9:MRS4:ATP5:PMC1:QCR2:QCR7:FLU1:VMA11:VMA13:VMA2	5385:46933:7:46872:8121:15238:297:15078:46961:5524:15665:15606:5381:5388:22890:4129
		15078	hydrogen ion transmembrane transporter activity	11 out of 332 genes, 3.3%	62 out of 6473 background genes, 1.0%	0.07545	0.025	ATP7:ATP18:VMA7:QCR8:COX9:ATP5:QCR2:QCR7:VMA11:VMA13:VMA2	46933:46872:8121:15078:46961:5524:4129
		16887	ATPase activity	25 out of 332 genes, 7.5%	231 out of 6473 background genes, 3.6%	0.08379	0.02	ARP8:C1_02760W_A:ATP7:C1_08160W_A:PXA2:ATP18:VMA7:SSC1:ATP5:PMC1:AFG3:C3_05010C_A:C5_00570W_A:RAD18:RAD6:DBP2:CR_02970C_A:CR_04180C_A:VMA13:DBP8:VMA2:ADP1:HSP60:SSB1:DRS1	46933:4004:43142:3684:4012:8270:4842:3697:3729:46961:15616:3677:3700:30234:16887:4222:287:3676:51087:46872:3678:43140:19829:51082:5085:5524:3688:5388:8237:42626:4003:8026
		8324	cation transmembrane transporter activity	20 out of 332 genes, 6.0%	168 out of 6473 background genes, 2.6%	0.09846	0.02	ATP7:C1_10200C_A:AVT4:ATP18:C2_02180W_A:ZRT2:VMA7:QCR8:COX9:MRS4:ATP5:PMC1:C5_00570W_A:QCR2:QCR7:C7_00230W_A:FLU1:VMA11:VMA13:VMA2	46933:7:4012:8121:297:15078:46961:15606:15188:4129:5385:287:46872:19829:15238:5524:15186:15665:5381:5302:5388:22890
	C. albicans GO Terms: Function (3' UTR of of over 200 bases)
		GOID	GO_term	Cluster frequency	Background frequency	Corrected P-value	False discovery rate	Gene(s) annotated to the term	Directly Annotated GOID List
		5198	structural molecule activity	34 out of 332 genes, 10.2%	257 out of 6473 background genes, 4.0%	7.09e-05	0	TUB2:RPL6:CDC12:C1_04200C_A:C1_06470W_A:MRPL3:SSU81:C1_12610W_A:RPL14:ACT1:MED8:RPL17B:PIR1:RPS7A:YST1:C3_06750W_A:C4_00330C_A:RPS6A:BEM1:RPL20B:C4_01790W_A:C4_04390W_A:C5_01540W_A:C5_02190C_A:RPS25B:CIC1:C6_04100W_A:RPS28B:SSR1:RBR2:RPS27:RPS20:CR_08480C_A:TUB1	30674:46933:3735:35091:4402:15450:978:5200:10485:32266:5199:3729:33149:3725:5091:5525:5198:5034:17025:32947:5545:1106:3924:17056:3723:4525:5078
		98772	molecular function regulator	29 out of 332 genes, 8.7%	220 out of 6473 background genes, 3.4%	0.00061	0	C1_02090C_A:C1_02160W_A:C1_02240W_A:C1_03370W_A:BUD6:C1_10960W_A:IRA2:SSK1:BUB2:C3_02920W_A:C3_03060W_A:C3_05790C_A:MMS21:C3_07050W_A:BEM1:CDC24:CKB2:CKS1:CDC20:C6_02190C_A:C7_03480W_A:CLB4:CR_00820C_A:CR_01490C_A:CR_02910W_A:LYS5:CLG1:CR_07640C_A:CR_08290W_A	70917:3779:43022:4712:5543:31435:43130:8536:8270:5087:4842:166:4857:32266:19208:5519:3729:8428:8047:156:4674:32947:32403:70491:42803:8565:61575:8143:5096:4860:287:1671:42393:30295:989:30332:97027:10997:5089:8897:3785:5091:5085:5524:19789:30291:19901:4713:17112:19887:5086:16538
		30234	enzyme regulator activity	23 out of 332 genes, 6.9%	182 out of 6473 background genes, 2.8%	0.01429	0	C1_02090C_A:C1_03370W_A:BUD6:C1_10960W_A:IRA2:SSK1:BUB2:C3_02920W_A:C3_05790C_A:MMS21:C3_07050W_A:BEM1:CKB2:CKS1:CDC20:C6_02190C_A:CLB4:CR_00820C_A:CR_02910W_A:LYS5:CLG1:CR_07640C_A:CR_08290W_A	70917:3779:43022:4712:31435:43130:8270:4842:166:4857:32266:19208:5519:3729:8428:8047:156:4674:32947:32403:70491:42803:61575:5096:8143:4860:287:1671:42393:30295:989:30332:97027:10997:8897:3785:5091:5524:19789:30291:19901:4713:19887:16538
		5515	protein binding	49 out of 332 genes, 14.8%	548 out of 6473 background genes, 8.5%	0.01949	0	ROT1:C1_02240W_A:YKT6:CDC12:C1_04090C_A:IRE1:BUD6:SSU81:MYO2:SSK1:C2_02520W_A:MED8:DAD2:RPC40:MAF1:SSO2:C2_10120W_A:VPS8:HRT1:C3_02490C_A:HTA3:C3_03930W_A:SBP1:C3_04540C_A:BEM1:C4_01790W_A:HFL2:PHO4:CKS1:SUI1:CDC20:CIC1:C6_02190C_A:C6_04100W_A:GAC1:MET28:MCM1:CDC34:C7_02480W_A:TIM9:CRM1:CR_00820C_A:DAD3:CLG1:DAD4:CR_08290W_A:WAL1:MED21:UBC4	3779:43022:3735:31369:4712:31435:8270:5516:5087:44377:70577:4857:1105:5519:15616:5034:4674:32947:4386:43495:1106:994:3743:8565:61575:30674:31072:978:1056:1132:30295:46983:10997:3785:4521:3682:5198:5525:5524:3688:17025:5049:61630:1077:4713:51015:43130:51010:1047:35091:8536:5484:43047:4842:166:3714:43565:32266:3713:51020:3729:33149:8047:31683:156:35064:1078:8139:32403:3677:3700:5545:70491:42803:509…
	S. cerevisiae GO Terms: Function (3' UTR of less than 50 bases)
		No significant ontology term can be found for input genes.
		31 out of 123 input genes are directly annotated to root term 'molecular function unknown':
	S. cerevisiae GO Terms: Function (3' UTR of 50-99 bases)
		GOID	GO_term	Cluster frequency	Background frequency	P-value	FDR	Expected FP	Gene(s) annotated to the term
		5198	structural molecule activity	92 out of 1098 genes, 8.4%	346 out of 7164 background genes, 4.8%	1.14e-05	0	0	NUP60/YAR002W:MRPL16/YBL038W:NUP170/YBL079W:RPL32/YBL092W:SPT7/YBR081C:RPS9B/YBR189W:TAF5/YBR198C:MRPS5/YBR251W:MRPL27/YBR282W:CDC10/YCR002C:IMG2/YCR071C:RPN6/YDL097C:NUP84/YDL116W:RPL4B/YDR012W:RPS11A/YDR025W:RPS13/YDR064W:STE5/YDR103W:TAF10/YDR167W:NUP42/YDR192C:MHR1/YDR296W:MRPS28/YDR337W:RPN9/YDR427W:RPL37B/YDR500C:RPL23B/YER117W:RPL22B/YFL034C-A:NIC96/YFR002W:RPL2A/YFR031C-A:RPL30/YGL030W:SE…
		5515	protein binding	143 out of 1098 genes, 13.0%	617 out of 7164 background genes, 8.6%	2.65e-05	0	0	GIP4/YAL031C:CNE1/YAL058W:SLA1/YBL007C:HIR1/YBL008W:SEC17/YBL050W:VPS15/YBR097W:CDC28/YBR160W:FZO1/YBR179C:TAF5/YBR198C:ARC40/YBR234C:SNF5/YBR289W:BSD2/YBR290W:CDC10/YCR002C:SYO1/YDL063C:GET3/YDL100C:IWR1/YDL115C:CDC48/YDL126C:DLD2/YDL178W:GLE1/YDL207W:GRX3/YDR098C:STE5/YDR103W:NUM1/YDR150W:TAF10/YDR167W:TCP1/YDR212W:AHA1/YDR214W:RAD9/YDR217C:PCF11/YDR228C:SWA2/YDR320C:DAD4/YDR320C-A:PEX3/YDR329C…
		16740	transferase activity	173 out of 1098 genes, 15.8%	837 out of 7164 background genes, 11.7%	0.0034	0	0	KIN3/YAR018C:CDC15/YAR019C:SAS3/YBL052C:PRS4/YBL068W:TEL1/YBL088C:GPI18/YBR004C:CST26/YBR042C:AKL1/YBR059C:VPS15/YBR097W:RAD16/YBR114W:CDC28/YBR160W:ECM31/YBR176W:ALG7/YBR243C:HIS7/YBR248C:RIB5/YBR256C:SHM1/YBR263W:DUG2/YBR281C:PGS1/YCL004W:RBK1/YCR036W:SLC1/YDL052C:RAM1/YDL090C:KIN28/YDL108W:RPC53/YDL150W:MGT1/YDL200C:TRM8/YDL201W:PAA1/YDR071C:IPT1/YDR072C:UBC13/YDR092W:TRM82/YDR165W:CAB5/YDR196…
		3735	structural constituent of ribosome	60 out of 1098 genes, 5.5%	226 out of 7164 background genes, 3.2%	0.0037	0	0	MRPL16/YBL038W:RPL32/YBL092W:RPS9B/YBR189W:MRPS5/YBR251W:MRPL27/YBR282W:IMG2/YCR071C:RPL4B/YDR012W:RPS11A/YDR025W:RPS13/YDR064W:MHR1/YDR296W:MRPS28/YDR337W:RPL37B/YDR500C:RPL23B/YER117W:RPL22B/YFL034C-A:RPL2A/YFR031C-A:RPL30/YGL030W:RPL28/YGL103W:RPS2/YGL123W:RPS26A/YGL189C:MRPL25/YGR076C:RPL11B/YGR085C:RSM27/YGR215W:MRPL9/YGR220C:RPS27B/YHR021C:PPE1/YHR075C:RPL34B/YIL052C:MRPL8/YJL063C:MRPL49/YJ…
	S. cerevisiae GO Terms: Function (3' UTR of 100-149 bases)
		GOID	GO_term	Cluster frequency	Background frequency	P-value	FDR	Expected FP	Gene(s) annotated to the term
		5515	protein binding	151 out of 1151 genes, 13.1%	617 out of 7164 background genes, 8.6%	6.07e-06	0	0	VPS8/YAL002W:FUN12/YAL035W:ECM21/YBL101C:GRX7/YBR014C:MUM2/YBR057C:CYC8/YBR112C:MSI1/YBR195C:HPC2/YBR215W:ISW1/YBR245C:PAF1/YBR279W:STP22/YCL008C:STE50/YCL032W:RVS161/YCR009C:TAH1/YCR060W:ABP1/YCR088W:SLX5/YDL013W:PEX19/YDL065C:SCM3/YDL139C:CCT4/YDL143W:SHR3/YDL212W:YPD1/YDL235C:DAD1/YDR016C:PET100/YDR079W:DPB4/YDR121W:SAC6/YDR129C:TAF12/YDR145W:SEC1/YDR164C:CDC37/YDR168W:ARG82/YDR173C:SLY1/YDR18…
		16740	transferase activity	190 out of 1151 genes, 16.5%	837 out of 7164 background genes, 11.7%	3.3e-05	0	0	PMT2/YAL023C:FUS3/YBL016W:NCL1/YBL024W:CDC27/YBL084C:PKC1/YBL105C:COQ1/YBR003W:MNN2/YBR015C:GAL7/YBR018C:CHS3/YBR023C:CDS1/YBR029C:ALG1/YBR110W:TPS1/YBR126C:RPB5/YBR154C:SWD3/YBR175W:EHT1/YBR177C:ABD1/YBR236C:ARO4/YBR249C:TAE1/YBR261C:EFM2/YBR271W:SPB1/YCL054W:SLX5/YDL013W:CDC7/YDL017W:NAT1/YDL040C:FAD1/YDL045C:UBC9/YDL064W:BRE1/YDL074C:PMT1/YDL095W:DUN1/YDL101C:POL3/YDL102W:QRI1/YDL103C:NSE4/YDL…
		3735	structural constituent of ribosome	65 out of 1151 genes, 5.6%	226 out of 7164 background genes, 3.2%	0.00042	0	0	MRP21/YBL090W:RPL19A/YBR084C-A:MRPL37/YBR268W:MRPL32/YCR003W:IMG1/YCR046C:MRP10/YDL045W-A:RPP1A/YDL081C:RPL13A/YDL082W:RPP1B/YDL130W:RPL35A/YDL191W:MRPL1/YDR116C:RSM24/YDR175C:MRPL7/YDR237W:MRPL35/YDR322W:MRP1/YDR347W:RPP2B/YDR382W:MRP20/YDR405W:RPS17B/YDR447C:MRPL28/YDR462W:RSM18/YER050C:RPS8B/YER102W:RPL29/YFR032C-A:YMR31/YFR049W:RPL24A/YGL031C:RPL7A/YGL076C:RSM23/YGL129C:RPL26B/YGR034W:MRPS35/…
		5198	structural molecule activity	90 out of 1151 genes, 7.8%	346 out of 7164 background genes, 4.8%	0.00047	0	0	MRP21/YBL090W:TIP1/YBR067C:RPL19A/YBR084C-A:MRPL37/YBR268W:MRPL32/YCR003W:IMG1/YCR046C:MRP10/YDL045W-A:RPP1A/YDL081C:RPL13A/YDL082W:RPP1B/YDL130W:RPL35A/YDL191W:SEC31/YDL195W:MRPL1/YDR116C:TAF12/YDR145W:RSM24/YDR175C:MRPL7/YDR237W:MRPL35/YDR322W:SWR1/YDR334W:MRP1/YDR347W:RPP2B/YDR382W:MRP20/YDR405W:RPS17B/YDR447C:MRPL28/YDR462W:BIM1/YER016W:SRB4/YER022W:RSM18/YER050C:RPS8B/YER102W:ACT1/YFL039C:RP…
		16787	hydrolase activity	193 out of 1151 genes, 16.8%	891 out of 7164 background genes, 12.4%	0.00092	0	0	SPO7/YAL009W:FUN12/YAL035W:SEN34/YAR008W:APN2/YBL019W:YBL055C:UBP13/YBL067C:IPP1/YBR011C:TIP1/YBR067C:SEC18/YBR080C:PTC4/YBR125C:MAK5/YBR142W:ARL1/YBR164C:EHT1/YBR177C:ROT2/YBR229C:PRP5/YBR237W:ISW1/YBR245C:POP4/YBR257W:VMA9/YCL005W-A:PRD1/YCL057W:PTC6/YCR079W:PTC1/YDL006W:POL3/YDL102W:HNT1/YDL125C:PPH21/YDL134C:VMA1/YDL185W:RRI1/YDL216C:EHD3/YDR036C:ENA2/YDR039C:VMS1/YDR049W:HSP78/YDR258C:EXG2/Y…
	S .cerevisiae GO Terms: Function (3' UTR of 150-200 bases)
		GOID	GO_term	Cluster frequency	Background frequency	P-value	FDR	Expected FP	Gene(s) annotated to the term
		16740	transferase activity	99 out of 553 genes, 17.9%	837 out of 7164 background genes, 11.7%	0.00181	0	0	PSK1/YAL017W:CDC19/YAL038W:GAL1/YBR020W:HMT1/YBR034C:CHS2/YBR038W:TRM7/YBR061C:UBC4/YBR082C:BMT2/YBR141C:KTR4/YBR199W:DPB3/YBR278W:SAF1/YBR280C:ILV6/YCL009C:NFS1/YCL017C:PBN1/YCL052C:PGK1/YCR012W:ELO2/YCR034W:BUD23/YCR047C:NOP1/YDL014W:RTK1/YDL025C:MPS1/YDL028C:CDC53/YDL132W:KCS1/YDR017C:HEM1/YDR232W:MNN10/YDR245W:PEX10/YDR265W:SKP1/YDR328C:RPB7/YDR404C:RMT2/YDR465C:GIN4/YDR507C:STT3/YGL022W:TYW3…
		16462	pyrophosphatase activity	54 out of 553 genes, 9.8%	388 out of 7164 background genes, 5.4%	0.00422	0	0	MCM2/YBL023C:ATP3/YBR039W:VMA2/YBR127C:MCM7/YBR202W:RHB1/YCR027C:RAD18/YCR066W:ATP16/YDL004W:ARP2/YDL029W:ARF2/YDL137W:RAD57/YDR004W:SNQ2/YDR011W:MSS116/YDR194C:ATP5/YDR298C:PPN1/YDR452W:APA2/YDR530C:MCM3/YEL032W:GPA2/YER020W:RAD24/YER173W:DBP3/YGL078C:NBP35/YGL091C:INO80/YGL150C:PMR1/YGL167C:MCM6/YGL201C:VMA7/YGR020C:MSP1/YGR028W:RRM3/YHR031C:RHO3/YIL118W:TIF2/YJL138C:RAD26/YJR035W:PRP16/YKR086W…
		16817	hydrolase activity, acting on acid anhydrides	54 out of 553 genes, 9.8%	388 out of 7164 background genes, 5.4%	0.00422	0	0	MCM2/YBL023C:ATP3/YBR039W:VMA2/YBR127C:MCM7/YBR202W:RHB1/YCR027C:RAD18/YCR066W:ATP16/YDL004W:ARP2/YDL029W:ARF2/YDL137W:RAD57/YDR004W:SNQ2/YDR011W:MSS116/YDR194C:ATP5/YDR298C:PPN1/YDR452W:APA2/YDR530C:MCM3/YEL032W:GPA2/YER020W:RAD24/YER173W:DBP3/YGL078C:NBP35/YGL091C:INO80/YGL150C:PMR1/YGL167C:MCM6/YGL201C:VMA7/YGR020C:MSP1/YGR028W:RRM3/YHR031C:RHO3/YIL118W:TIF2/YJL138C:RAD26/YJR035W:PRP16/YKR086W…
		16818	hydrolase activity, acting on acid anhydrides, in phosphorus-containing anhydrides	54 out of 553 genes, 9.8%	388 out of 7164 background genes, 5.4%	0.00422	0	0	MCM2/YBL023C:ATP3/YBR039W:VMA2/YBR127C:MCM7/YBR202W:RHB1/YCR027C:RAD18/YCR066W:ATP16/YDL004W:ARP2/YDL029W:ARF2/YDL137W:RAD57/YDR004W:SNQ2/YDR011W:MSS116/YDR194C:ATP5/YDR298C:PPN1/YDR452W:APA2/YDR530C:MCM3/YEL032W:GPA2/YER020W:RAD24/YER173W:DBP3/YGL078C:NBP35/YGL091C:INO80/YGL150C:PMR1/YGL167C:MCM6/YGL201C:VMA7/YGR020C:MSP1/YGR028W:RRM3/YHR031C:RHO3/YIL118W:TIF2/YJL138C:RAD26/YJR035W:PRP16/YKR086W…
	S. cerevisiae GO Terms: Function (3' UTR over 200 bases)
		GOID	GO_term	Cluster frequency	Background frequency	P-value	FDR	Expected FP	Gene(s) annotated to the term
		9055	electron carrier activity	11 out of 527 genes, 2.1%	22 out of 7164 background genes, 0.3%	3.89e-05	0	0	KTI11/YBL071W-A:COX9/YDL067C:OLE1/YGL055W:COX13/YGL191W:COX6/YHR051W:DRE2/YKR071C:COX12/YLR038C:COX8/YLR395C:COX5A/YNL052W:CYB5/YNL111C:CYT1/YOR065W
		16740	transferase activity	94 out of 527 genes, 17.8%	837 out of 7164 background genes, 11.7%	0.0039	0	0	SCT1/YBL011W:ACH1/YBL015W:RER2/YBR002C:MEC1/YBR136W:ATG12/YBR217W:SAT4/YCR008W:SLM3/YDL033C:PSA1/YDL055C:AIR2/YDL175C:UFD2/YDL190C:NUS1/YDL193W:HEM3/YDL205C:ARO3/YDR035W:RPC11/YDR045C:CDC34/YDR054C:LCB2/YDR062W:TRM1/YDR120C:RMD5/YDR255C:AKR1/YDR264C:PIB1/YDR313C:SIZ1/YDR409W:RAD30/YDR419W:SIP1/YDR422C:PKH3/YDR466W:SAM2/YDR502C:GAL83/YER027C:ISD11/YER048W-A:MET6/YER091C:SLX8/YER116C:SAK1/YER129W:A…
